# Supplementary material for: Identification and Heterologous Expression of the Chaxamycin Biosynthesis Gene Cluster from Streptomyces leeuwenhoekii
Source: PubMed Central journal article supplement (PMC4551226; doi:10.1128/aem.01039-15), 2015-08-07
Supplement: AEM.01039-15_zam999116510so1.pdf [file AEM.01039-15_zam999116510so1.pdf]

## Supplemental Material

### Identification and heterologous expression of the chaxamycin biosynthetic gene cluster from *Streptomyces leeuwenhoekii*

Jean Franco Castro,<sup>a,b</sup> Valeria Razmilic,<sup>a,b</sup> Juan Pablo Gomez-Escribano,<sup>b</sup> Barbara Andrews,<sup>a</sup> Juan A. Asenjo,<sup>a</sup>  
Mervyn J. Bibb<sup>b#</sup>

Centre for Biotechnology and Bioengineering (CeBiB), Department of Chemical Engineering and Biotechnology, Universidad de Chile, Santiago, Chile <sup>a</sup>; Department of Molecular Microbiology, John Innes Centre, Norwich Research Park, Norwich, United Kingdom <sup>b</sup>

Running head: Chaxamycin gene cluster of *S. leeuwenhoekii*

# Address correspondence to Mervyn J. Bibb, [mervyn.bibb@jic.ac.uk](mailto:mervyn.bibb@jic.ac.uk)

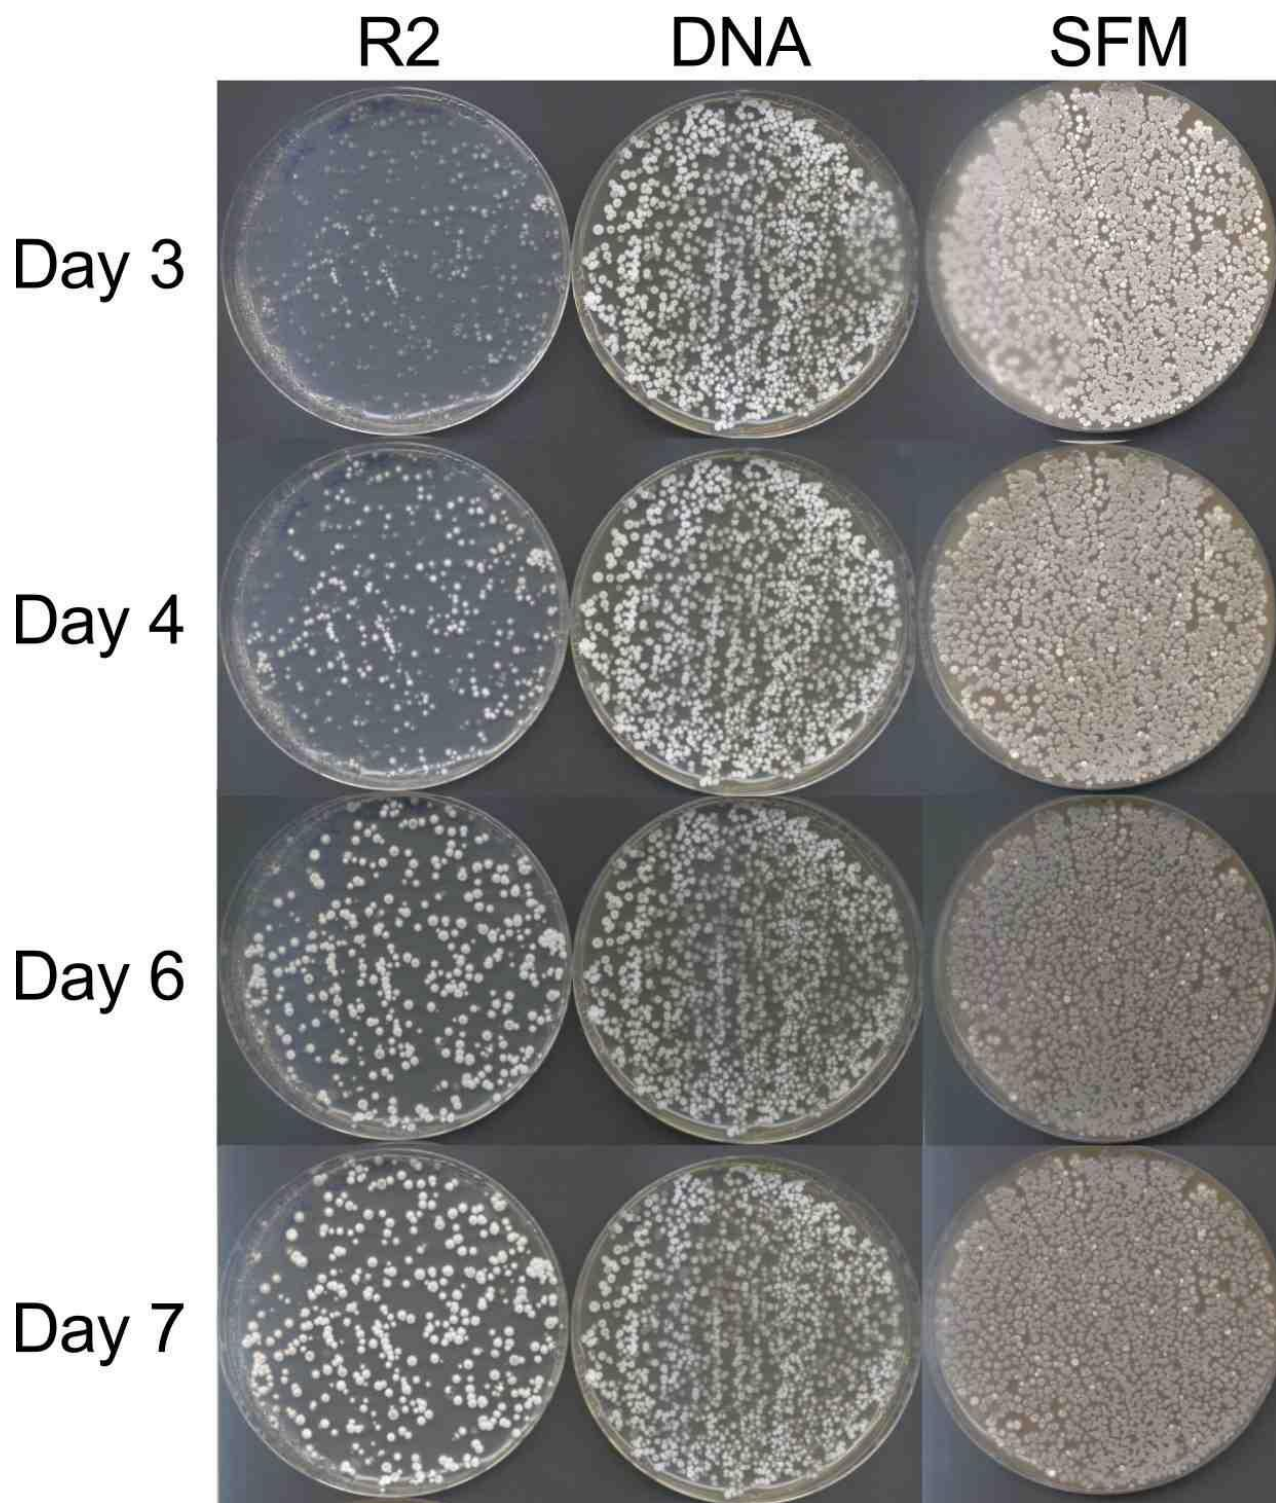

**FIG S1** Evaluation of growth and sporulation of *S. leeuwenhoekii* on R2, DNA and SFM agar media at 30 °C. All media were supplemented with trace elements as for R2. Recipes from (1).

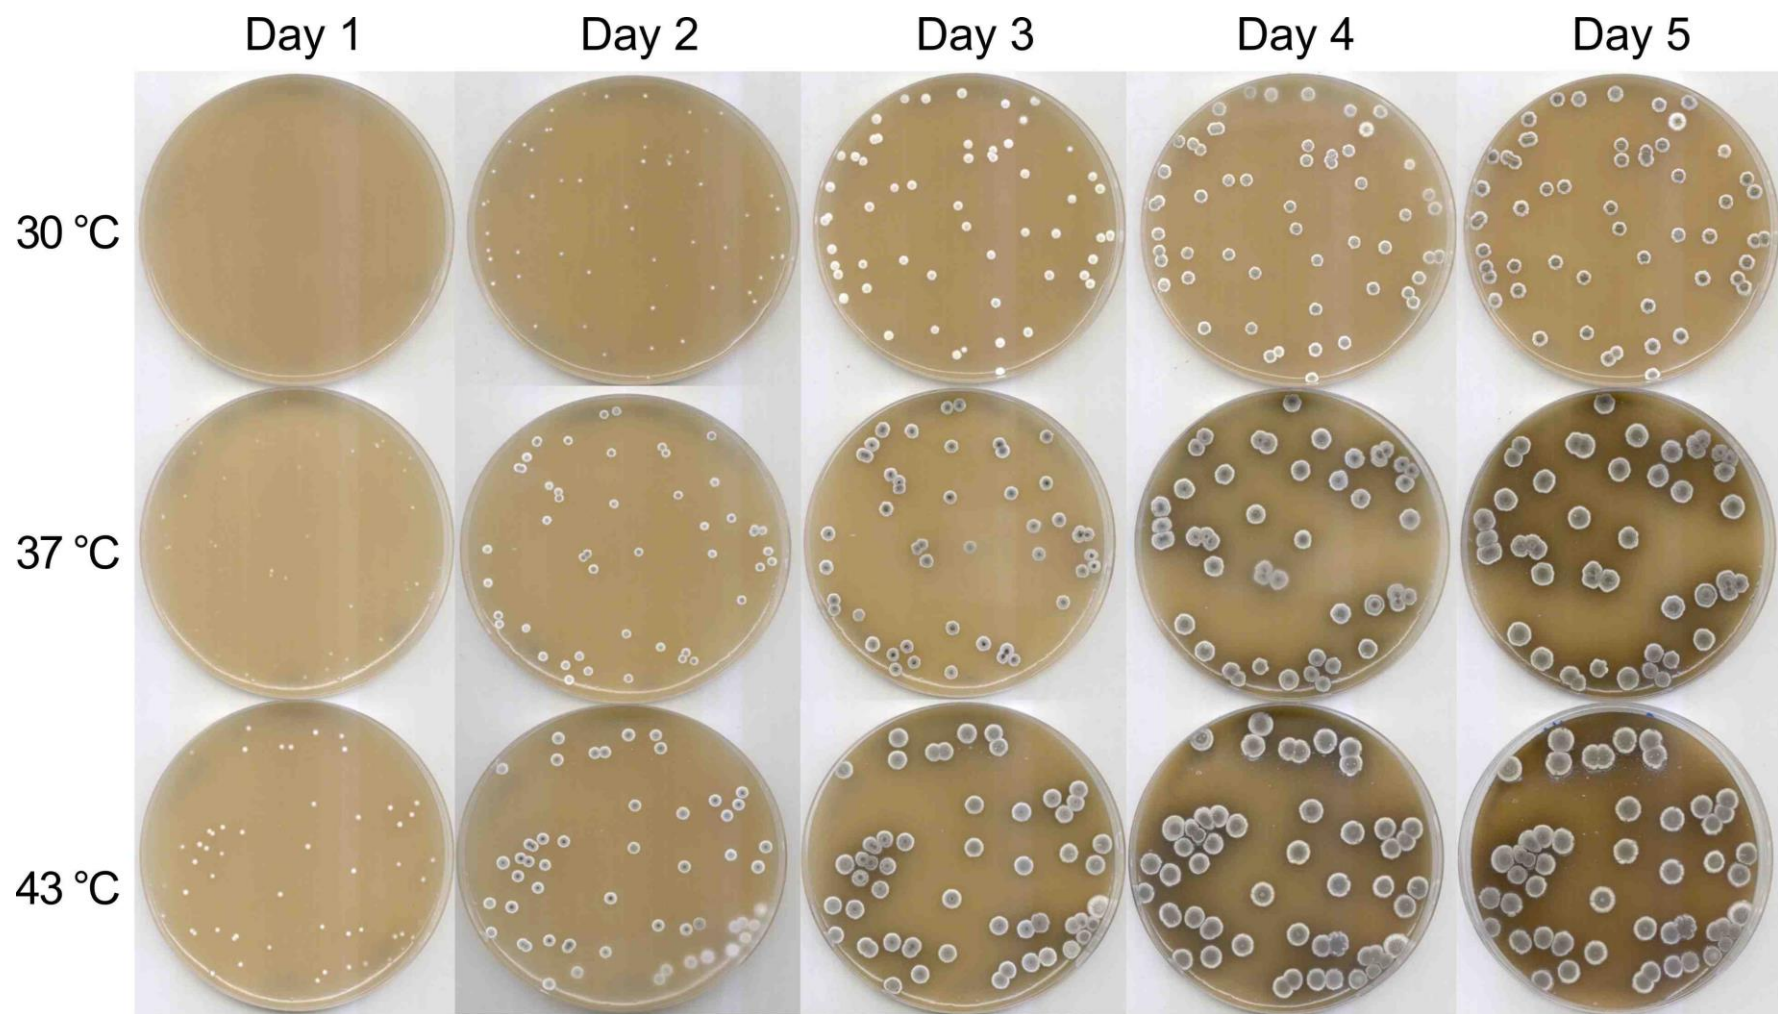

**FIG S2** Evaluation of growth of *S. leeuwenhoekii* at different temperatures (30 °C, 37 °C and 43 °C) for 5 days on SFM agar. Fastest growth and sporulation were observed at 43 °C.

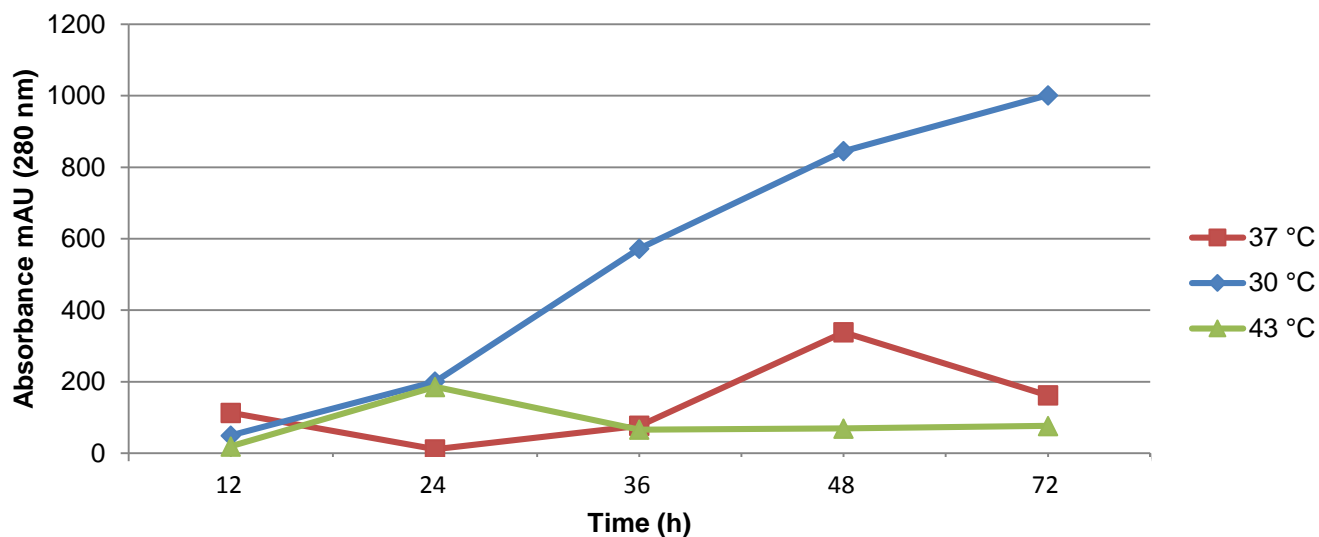

**FIG S3** Evaluation of chaxamycin production by *S. leeuwenhoekii* in modified ISP2 liquid medium at different temperatures (30 °C, 37 °C and 43 °C). Samples were analysed by LC-MS as described in Materials and Methods; chromatograms were recorded by detection of absorbance at 280 nm (2); peaks corresponding to the different chaxamycin species were identified by their retention times compared with standards, and by mass spectrometry; chaxamycin production was estimated as the sum of the area of the peaks at 280 nm.

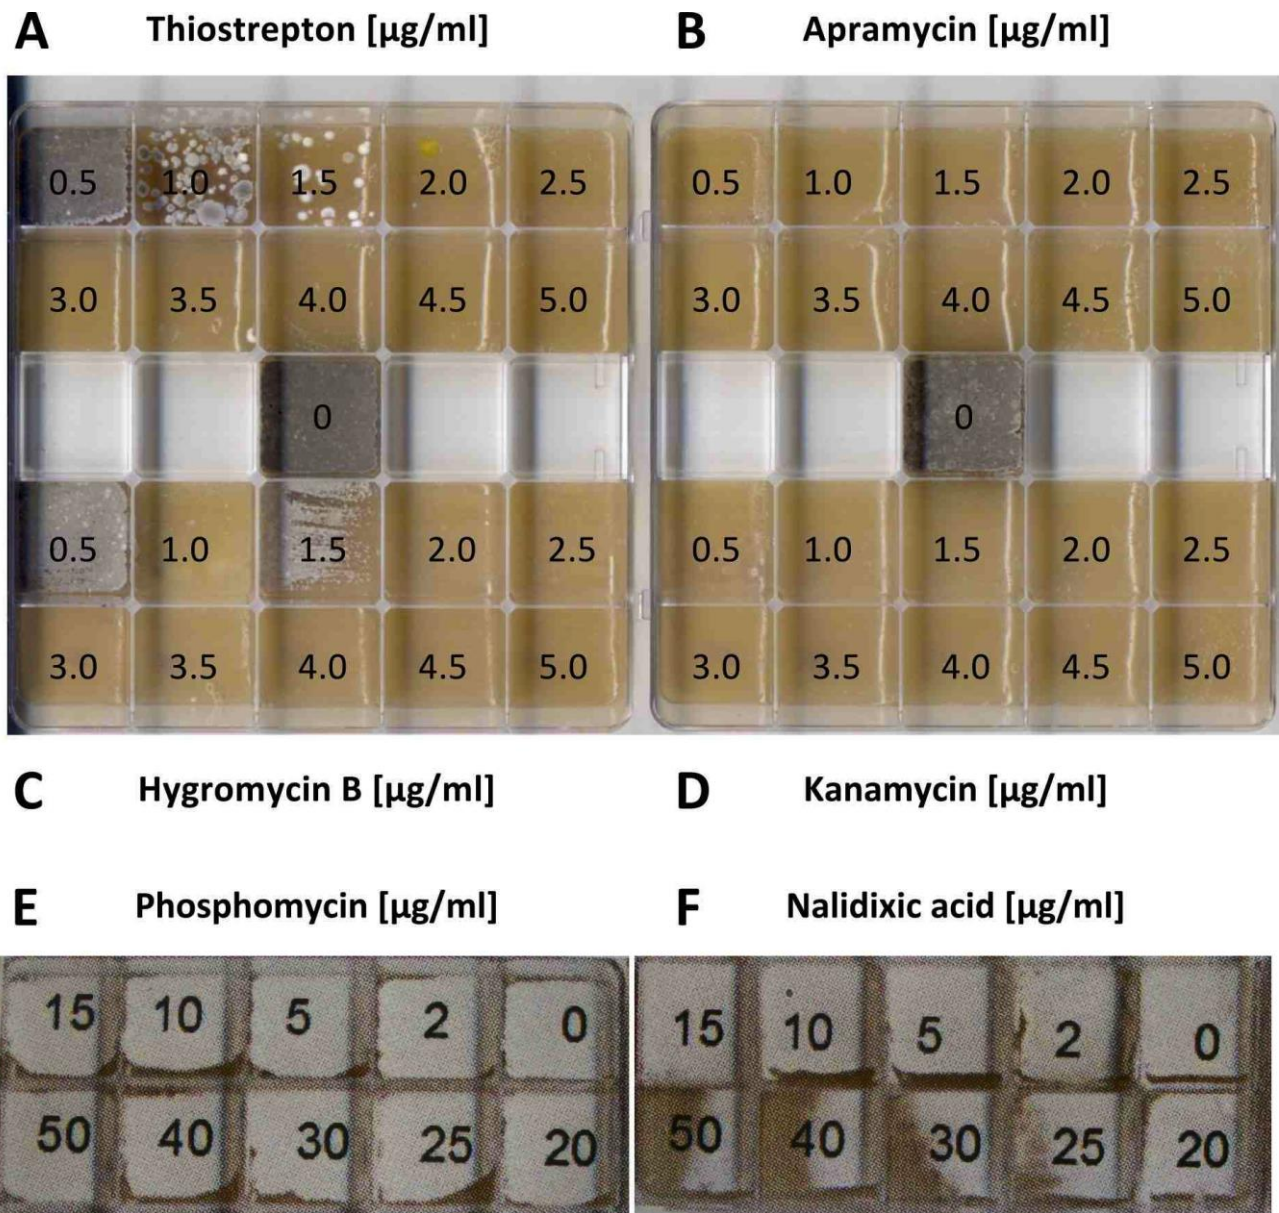

**FIG S4** Evaluation of *S. leeuwenhoekii* susceptibility to antibiotics commonly used for selection during genetic manipulation in actinomycetes. To obtain agar medium homogeneously supplemented with the antibiotic, 2 ml Eppendorf tubes with 2 ml of SFM agar were kept in a heating block set at 50 °C and the required amount of antibiotic stock was added to each tube and homogenised by pipetting; the content of each tube was then transferred into a separate well of a square Petri dish (10 cm side, with 25 square wells). Each well was inoculated with  $10^8$  spores of *S. leeuwenhoekii*; plates were incubated at 30 °C for 7 days. Note: the well containing 1.0 microgram/ml hygromycin B failed to receive a spore inoculum; repetition of the experiment indicated complete susceptibility to 2.0 microgram/ml hygromycin B.

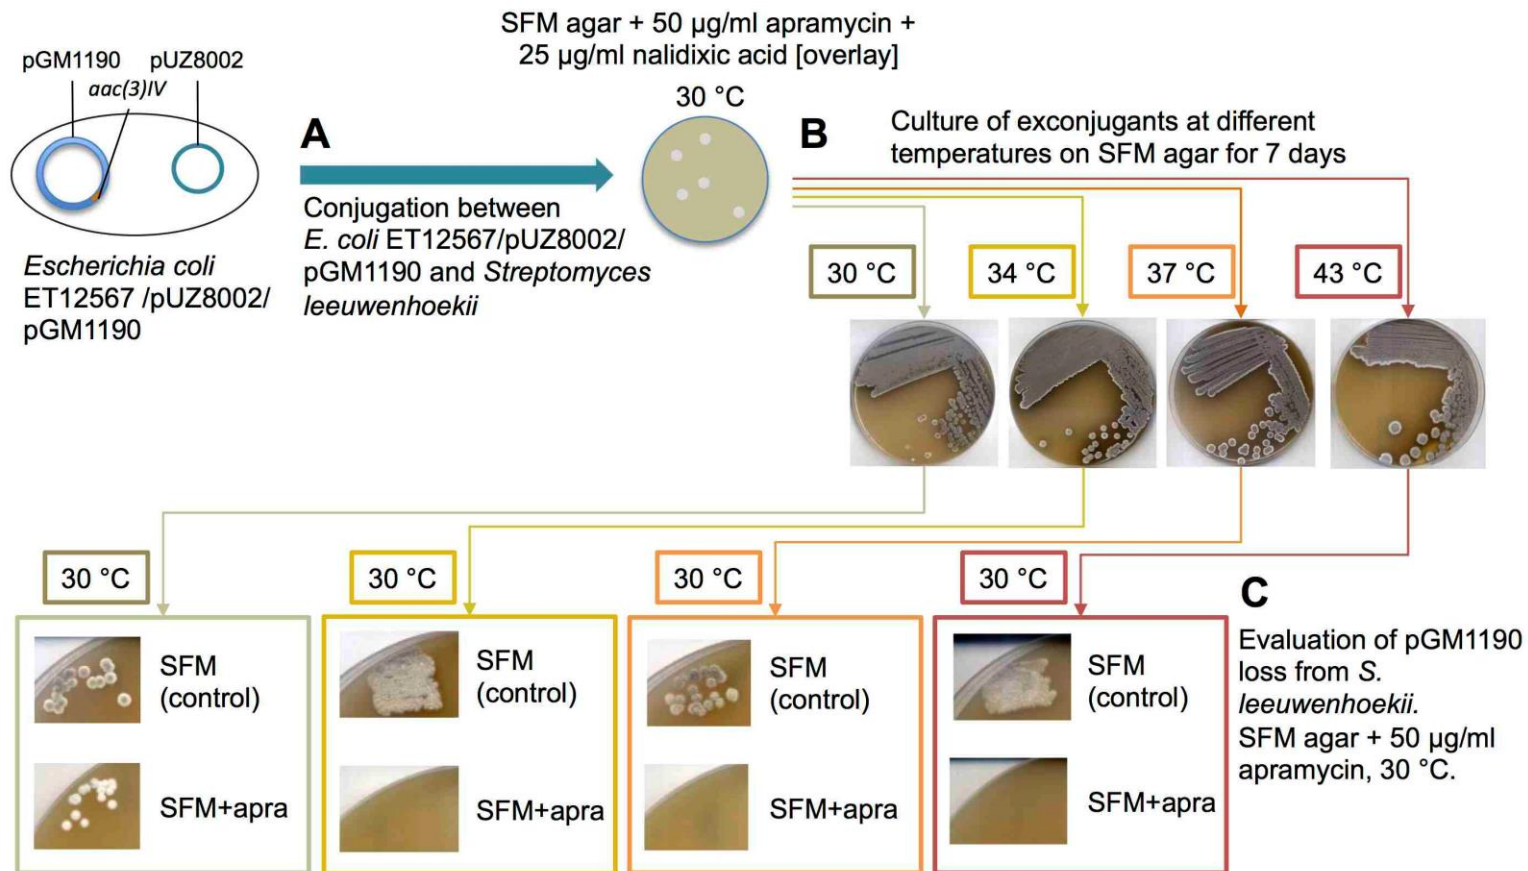

**FIG S5** Evaluation of the usability of the replicative temperature-sensitive vector pGM1190 in *S. leeuwenhoekii*. **(A)** pGM1190 (which carries the apramycin resistance gene *aac(3)IV*) was mobilised into *S. leeuwenhoekii* by conjugation from *E. coli* ET12567/pUZ8002, and exconjugants were selected for apramycin resistance (50 µg/ml). **(B)** Spores from selected exconjugants were streaked in SFM agar without antibiotic and cultured at 30 °C, 34 °C, 37 °C or 43 °C. **(C)** Isolated colonies from each plate were replicated to both SFM and SFM + apramycin agar and cultured at 30 °C for 4 days. Clones from plates previously incubated at 37 °C or 43 °C did not grow in the presence of apramycin, indicating the loss of pGM1190; only a few clones from plates previously incubated at 34 °C grew in the presence of apramycin, indicating persistence of pGM1190 at a low frequency. Since *S. leeuwenhoekii* grows well at 37 °C we chose this temperature for all further experiments (see FIG S7).

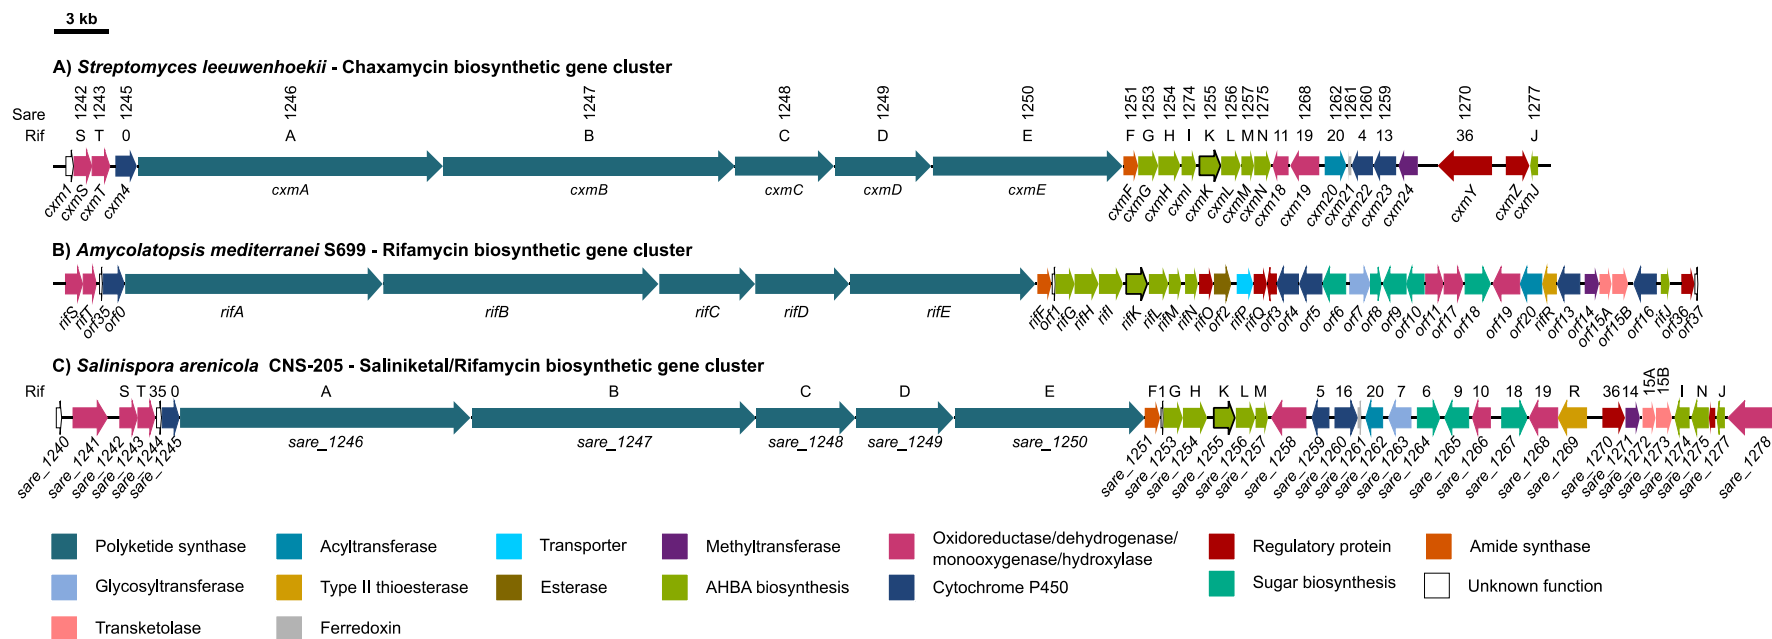

**FIG S6** Comparison of the chaxamycin biosynthetic gene cluster (*cxm*) from *Streptomyces leeuwenhoekii* (A) with the saliniketal/rifamycin biosynthetic gene cluster (*sare*) from *Salinispora arenicola* CNS-205 (B; CP000850.1) and the rifamycin biosynthetic gene cluster (*rif*) from *Amycolatopsis mediterranei* S699 (C; AF040570.3).

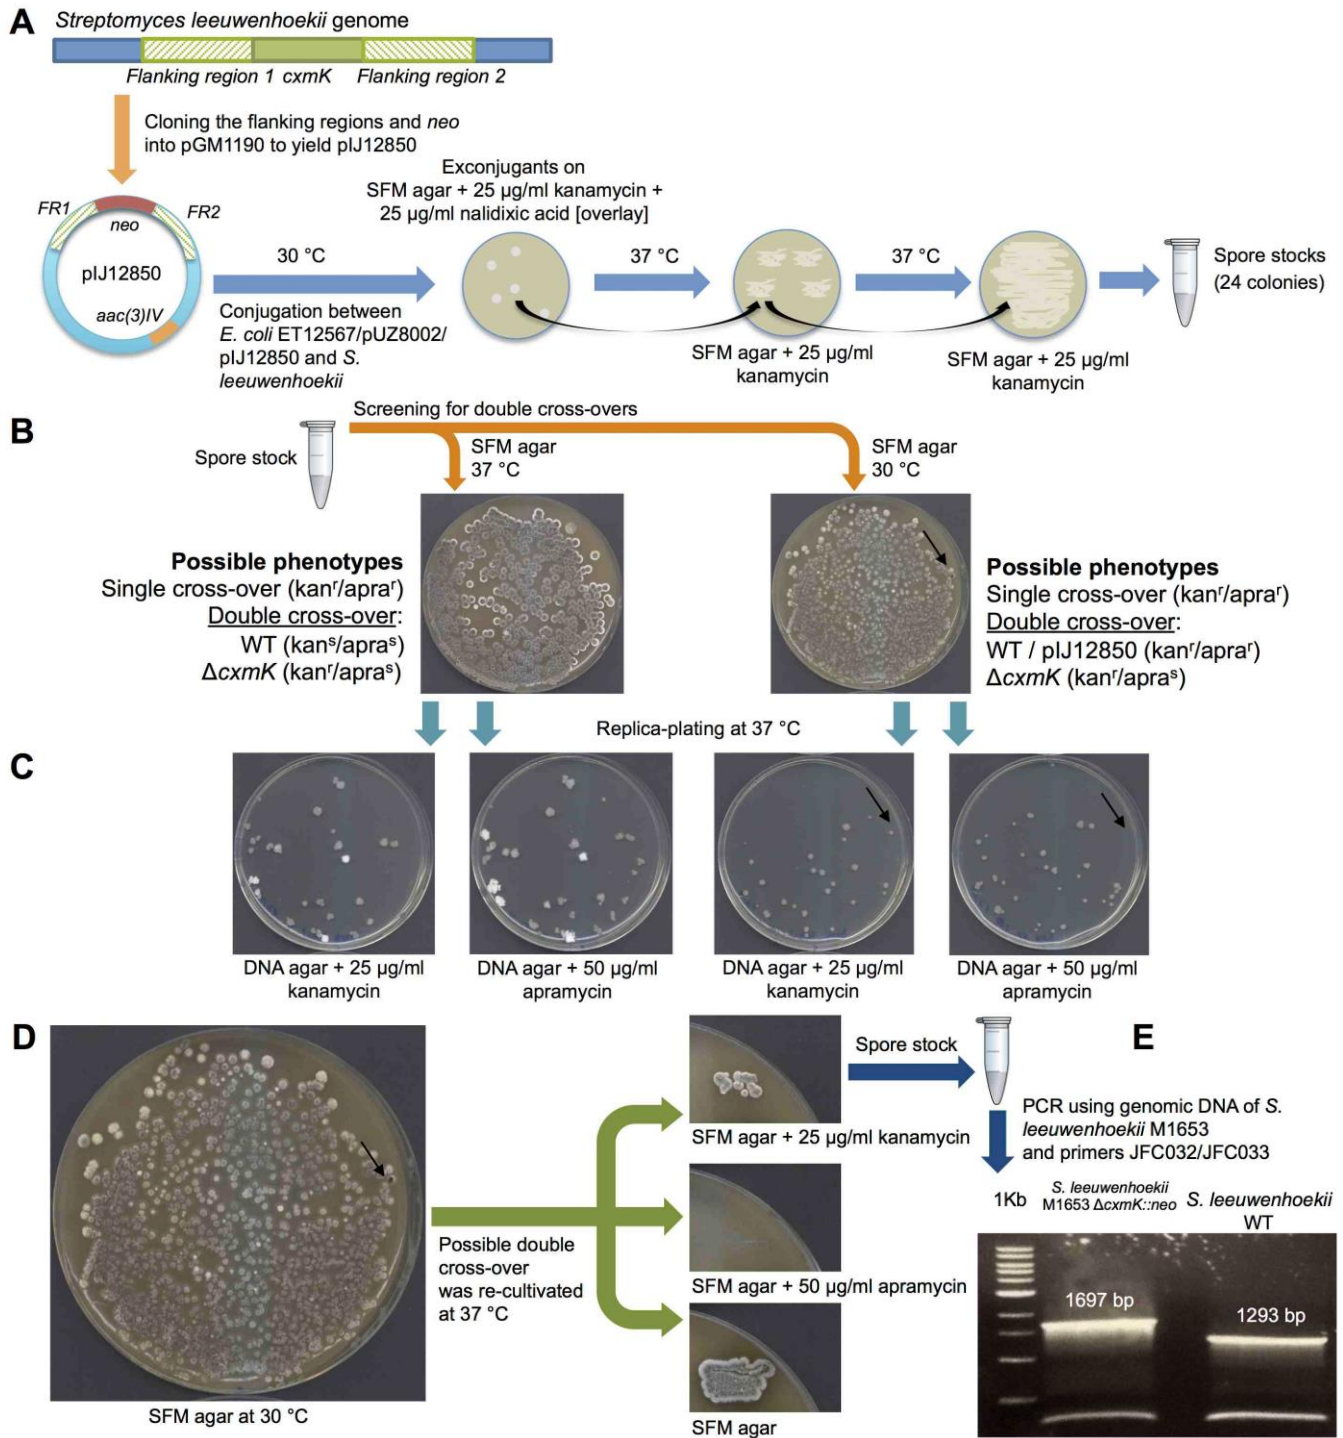

**FIG S7** Methodology used to construct *S. leeuwenhoekii* M1653 ( $\Delta$ *cxmK::neo*). **(A)** Flanking regions of the AHBA synthase gene (*cxmK*) and kanamycin resistance gene *neo* were cloned into pGM1190 (which carries the apramycin resistance gene *aac(3)/IV*) to yield pIJ12850, which was then mobilised into *S. leeuwenhoekii* by conjugation from *E.*



*coli* ET12567/pUZ8002/pIJ12850 and the plates incubated at 30 °C (see Materials and Methods). Several kanamycin-resistant exconjugants were replicated on to SFM agar containing kanamycin and incubated at 37 °C, a temperature at which the vector cannot replicate and therefore all growing colonies must have integrated the resistance gene into the chromosome by, at least, a single cross-over recombination event. Spore stocks from 24 kanamycin-resistant exconjugants were prepared from plates incubated at 37 °C, and used for screening of double cross-over recombinants. **(B)** Spores were plated on SFM agar without antibiotics and incubated at either 30 or 37 °C. **(C)** After seven days, colonies were replica-plated sequentially on DNA agar medium supplemented with kanamycin and DNA agar with apramycin, and cultivated at 37 °C for one day. The different phenotypes were expected to be: kan<sup>r</sup>/apra<sup>r</sup> (pIJ12850 still integrated in the chromosome, no second cross-over event); kan<sup>s</sup>/apra<sup>s</sup> if a second cross-over event excised pIJ12850 from the chromosome followed by loss of the plasmid (and hence apramycin and kanamycin resistance) at 37 °C or kan<sup>r</sup>/apra<sup>s</sup> if a second cross-over event excised the pIJ12850 backbone (losing the apramycin resistance gene) while at the same time replacing *cxmK* with *neo* leading to the mutant  $\Delta cxmK::neo$ . **(D)** One kan<sup>r</sup>/apra<sup>s</sup> colony (indicated by the arrow) was streaked sequentially on SFM agar supplemented with kanamycin, SFM agar supplemented with apramycin and SFM agar without antibiotic as control, and the kan<sup>r</sup>/apra<sup>s</sup> phenotype expected for the  $\Delta cxmK::neo$  mutant confirmed. **(E)** PCR analysis with primers JFC032/JFC033 confirmed that the chosen clone had the expected amplicon size for the replacement of *cxmK* with *neo*; the PCR product was confirmed by Sanger sequencing using the same primers. The resulting mutant strain was called *S. leeuwenhoekii* M1653 ( $\Delta cxmK::neo$ ).

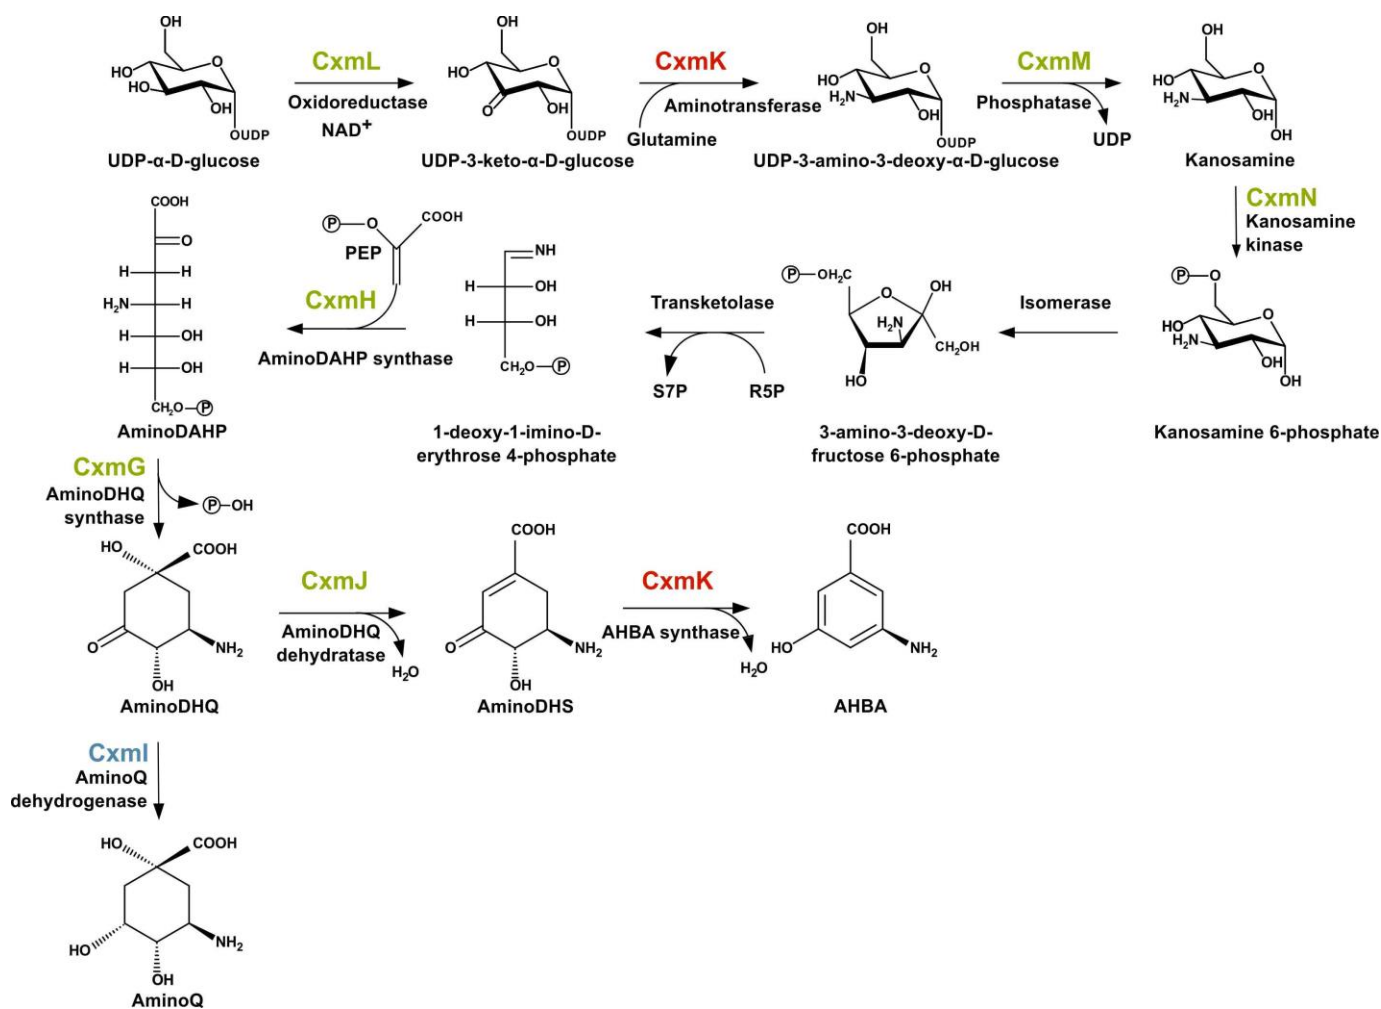

**FIG S8** Proposed biosynthesis of 3-amino-5-hydroxybenzoic acid (AHBA) through the amino-shikimate pathway in *Streptomyces leeuwenhoekii*. This pathway was first studied in *Amycolatopsis mediterranei* and serves as a reference for the identification of homologous genes in *S. leeuwenhoekii* (3). The pathway begins with the conversion of UDP- $\alpha$ -D-glucose into UDP-3-keto- $\alpha$ -D-glucose by CxmL (homologue of RifL). This is then converted into UDP-3-amino-3-deoxy- $\alpha$ -D-glucose by AHBA synthase, CxmK (highlighted in red, top; homologue of RifK); the phosphatase, CxmM (homologue of RifM), uses UDP-3-amino-3-deoxy- $\alpha$ -D-glucose as substrate to produce kanosamine. Kanosamine is then converted into D-kanosamine 6-phosphate by the enzyme kanosamine kinase, CxmN (homologue of RifN). The subsequent steps in the pathway towards AHBA are performed by a transketolase, followed by an isomerase that yields 1-deoxy-1-imino-D-erythrose 4-phosphate. In other microorganisms, such as *S. coelicolor* and *Escherichia coli*, the transketolase activity can be performed by a housekeeping transketolase (4); in *Salinispora arenicola* CNS-205 it can be performed by a dedicated transketolase located within the rifamycin/saliniketol biosynthetic gene cluster (genes *Sare\_1272* and *Sare\_1273*) (5); in *A. mediterranei* S699 it is

predicted that the transketolase *rif15A* and *rif15B* (designated *AMED\_0651* and *AMED\_0652* in strain U32), also located within the rifamycin biosynthetic gene cluster, could perform this step (6). The chaxamycin biosynthetic gene cluster does not contain a transketolase homologue, so presumably a transketolase encoded elsewhere in the genome performs this step in *S. leeuwenhoekii*. 1-deoxy-1-imino-D-erythrose 4-phosphate is the substrate of the enzyme 3,4-dideoxy-4-amino-D-arabino-heptulosonate 7-phosphate (aminoDAHP) synthase, CxmH (homologue of RifH), which produces aminoDAHP. AminoDAHP is then converted into 5-deoxy-5-amino-3-dehydroquinate (aminoDHQ) by CxmG (homologue of RifG). CxmJ, an amino DHQ dehydratase (homologue of RifJ), converts aminoDHQ into 5-amino-5-deoxy-3-dehydroshikimate (aminoDHS), which is used by the AHBA synthase, CxmK (highlighted in red, bottom), to yield the final product AHBA. CxmI (homologue of RifI; highlighted in blue) is an amino quinate (aminoQ) dehydratase, which catalyses the conversion of aminoDHQ into aminoQ, suggesting a salvage function. Deletion of *rifI* in *A. mediterranei* led to an accumulation of 20–25% more AHBA (7).

UDP = uridine diphosphate; kanosamine = 3-amino-3-deoxy-D-glucose; R5P = D-ribose 5-phosphate; S7P = D-sedoheptose 7-phosphate; aminoDAHP = 3,4-dideoxy-4-amino-D-arabino-heptulosonate 7-phosphate; aminoDHQ = 5-deoxy-5-amino-3-dehydroquinate; aminoQ = amino quinate; aminoDHS = 5-amino-5-deoxy-3-dehydroshikimate; AHBA = 3-amino-5-hydroxybenzoic acid.

10 20 30 40 50 60 70

A-CxmA 1 L F V V L R E H A A R F P G K V A F E D R R A V T Y G E L E A R T R R L A G H L A D L G V R R G D R V A L C L G N S V A M V E S Y L A V V R A G G I G V P L N 80  
A-RifA 1 L H V A L L E N A T R F A G K P A F A D D H R T V T Y G D L E A R T R R L A G H L A G L G V R H G D R V A I C L G N R V S T V E S Y F A I L R A G A V G V P L N 80  
A-NatA 1 L A V T L H E H A R R I P G K V A F A D D R R S V T Y A E L E T R T R H L A G H L V R L G L G R D R V A L C L G N S V A M V E G Y L A V V R A G G V G V P V N 80  
A-RubA 1 L P L V L R E H A D N F G G K V A F E D A E R A V T Y A D L E A R T R R L A G H L A G L G V R R G D R V M I C L R N S V E M L E S Y L A I L R A D A I G V P V N 80  
A-GdmAl 1 V P E L L R A N A D R F G D K P A C S D G H R T V S H A E L E R R T R R L A G H L A G L R L L H P G D R A M I C L G N R V E T V E S Y F G V L R A N G V A V P V N 80  
A-HbmAl 1 V P E L L R A N A D R F G D K P A C S D G H R T V S H A E L E R R T R R L A G H L A G L R L L H P G D R A M I C L G N R V E T V E S Y F G V L R A N G V A V P V N 80  
A-AsmA 1 L P E L L R E H A A R G D R V A F R D A R R A V T W D L E L R T R R L A G H L A A R R L P G D R A V I L L G N R V E T V E C Y L A L V R A G A V G V P L N 80  
A-RapA 1 L V D L L R A N A E R L G D K I A Y V S R L A L T H A E L A T R T G R I A G H L V D M G V D R G D R V A I L L G N R V E N I E S Y L A I A R A S A V A V P L N 80

Consensus  
LP+LLRE+ADRFG+KVAF+DDRRAVTYAELEARTRRLAGHLAAGLGR+RRGDRVAICLGNRVEMVESYLAVLRAG+VGVP+N

90 100 110 120 130 140 150

A-CxmA 81 P A S A R A E L E Y L L S D S G A T A V I T D T V Q I R R L G - - - - P G P H L T L L V T G D T P P P P G A H S Y D R L A D R E P D R A A P D D L G L D E V A 155  
A-RifA 81 P G S A T A E L E H P L T D S G A T V V T D A A Q A A R L R - - - - L A P H V E L L V T G D D V P - E G A H S Y D E L A L S E P A E P A A D D L E L D E P A 154  
A-NatA 81 P Q S A P A E L E Y L L A D S G A S F V L A G A G S A A T F R S E A S S T A P D L T V L V A G T S D V P P G A H A Y Q D L A V T D P G T P A P D D L G L D E V A 160  
A-RubA 81 P A S T D F E L D Y L L A D S E A A V V I T D P V H V A G L R - S P L S R P G A R R L L V T G T P A H A S V H A Y Q E L V R T E P A E P A R D L G L D D V A 159  
A-GdmAl 81 P R S T D A E L S Y L L A D S G A R L V L T D V A H A D Q F G R - L R E Q F P E L R V V V S G D G P L P K G F I A F E P L P D T E P Q L A A R D D L G L D E I T 159  
A-HbmAl 81 P R S T D A E L S Y L L A D S G A R L V L T D V A H A E Q F D R - L R E Q F P E L R V V V S G D G P L P K G F I A F E P L P D T E P D L A A R D D L G L D E V A 159  
A-AsmA 81 P V S T D A E L G A L L D D S G A R L V L T D A A H A D Q L A G - L R A T R P A L E V V H V D R - - - - - D Y E A L A G V D A P L P A H D A L E L D D L A 151  
A-RapA 81 P D A T E A E V A H F L S D S G A V A V I T D S A H L D D V R - - - - T A P A A N I L V L V G E E R T P P G V R S F A E L A T T E P L R P P D D L G L D E P A 156

Consensus  
P+STDAELEYLADSGARLVLTDAAHA+QF+R-LR+TAP+LRV+VTGD+P+PPGAHAY+ELADTEP+LPARDDLGLDEVA

170 180 190 200 210 220 230

A-CxmA 156 V M F Y T S G T T G R P K S V L S T O R N C L W S V A S S Y V P I P G L T D Q D R V L W P L P L F H S L S H I A C V L S V T V V G A T A R I M D G S S A D D V I 235  
A-RifA 155 V M F Y T S G T T G R P K S V V S T O R N C L W S V A S C Y V P P G L S D Q D R V L W P L P L F H S L S H I A C V L S A T V V G A S V R I A D G S S A D D V M 234  
A-NatA 161 V M F Y T S G T T G R P K S V L S T O R N C L W S V A S S Y V P I P D L R Q D D R V V W P L P L F H S L S H I A C V L S V T S V G A T A R I T E G S S P D D V L 240  
A-RubA 160 V T F Y T S G T T R E P K S V L S S O R N C L Y S V A A S Y V P I G L S A D R V L W P L P L F H S L S H I A C V L A V T A V G A T A R I M G S P G D E F L 239  
A-GdmAl 160 V M L Y T S G T T G L P K S V L S T O R N C L W S L A A C Y V P V T G L T A E D R V L W P L P L F H S L S H I V C L L A A T A V G A S T R I V D G V S T A D V L 239  
A-HbmAl 160 V M L Y T S G T T G L P K S V L S T O R N C L W S L A A C Y V P V T G L T A E D R V L W P L P L F H S L S H I V C L L A A T A V G A S T R I V D G V S T S D V L 239  
A-AsmA 152 V M L Y T S G T T G A P K S V L S T O R N C L W S V A A C Y A P V L G L T P D D R V L W P L P L F H S L S H I A G V L A T T A V G A T T R V V D G R S P Q D V L 231  
A-RapA 157 V M L Y T S G T T G T P K S V L S T G S G L W S A A Y C D I P A W E L T E N D V L L W P A P L F H R L A L H L C L L A T T A V G A T A R I M N G F V A S E V L 236

Consensus  
WM+YTS GTTGRPKGVLSTQRNCLWSVAACYVP+PGLTADDRVLWPLPLFHSLSHIACVLA+TAVGATARI+DGSSADDDVL

250 260 270 280 290 300 310

A-CxmA 236 D A L R A H A P T F L A G V P T T Y H H L V T A A R Q D G S A P G L R I G L V G G A V T T A A L R R D V E E T F G V P L V D A Y G S T E T C G A I T M N P P D 315  
A-RifA 235 R L I E A E S T F L A G V P T T Y H H L V R A A R Q R G S A P L R I G L A G G A V L G A R L R S E F E E T F G V P L I D A Y G S T E T C G A I T M N P P D 314  
A-NatA 241 D L L R T E T F L A G V P T T Y H H L V T A R T G L S P D L R I G L V G G A V T G S E L R S F E E T F G V P L V D A Y G S T E T C G A I T M N P P D 320  
A-RubA 240 A A R E T R A T F V A G V P T T Y H L L E A R R O R R I T L P D L R I G L V G G A V A G P G L C R S F R E E F G V P L V D A Y G S T E T C G A I T M N P P G 319  
A-GdmAl 240 D A L R E E R S T F I A G V P T T Y H H L I E A A R E R F A T P E L R I A L V G G A V A T A D L V R S F E A F G V P L V D A Y G S T E T C G A I A V N W - 317  
A-HbmAl 240 D A L R E E R S T F I A G V P T T Y H H L I E A A R E R F A T P E L R I A L V G G A V A T A D L V R S F E A T F G V P L V D A Y G S T E T C G A I A V N W I T 319  
A-AsmA 232 A A L H E E R S T V L A G V P T T Y H H L V R A A G E R G F L A P D L R V G L V G A I T T A E L R A A V E Q R F G V P L I D A Y G S T E T C G S I T V N W P T 311  
A-RapA 237 E L T E H R C T V L V G V P T M S R Y L L G A A T F F E R T S S L M G L V A G S V A P A S L I E G F E D V F G V P L L D T Y G C T E T S G S L T V N W L S 316

Consensus  
DALREERSTFLAGVPTTYHHLVEAAR+RGFS+PDLRIGLVGGAVATA+LRRSFEETFVGPLVDAYGSTETCGAIT+N+PD

330 340 350 360 370 380 390

A-CxmA 316 G L R V D G S C G L P V P G V D V R I V D P D T G R D L P A G A E G E V W S G P N V M V G Y H N S P E A T A A A L R D G W Y R T G D L A R R D D A G Y F T I C 395  
A-RifA 315 G A R V E G S C G L A V P G V D V R V V D P D T G L D V P A G E E G E V W S G P N V M V G Y H N S P E A T A A A M R D G W F R T G D L A R R D D A G Y F T I C 394  
A-NatA 321 G A R V E G S C G L P V P G V D V R I V D P D T G D D A P A G K E G E V W S G P N V M V G Y H N S P E A T R A A L R D G W F R T G D L A R R D D A G Y F T V C 400  
A-RubA 320 G V R V D G S C G L P V P G V D V R I V D P E T G R D V P A G A E G E V W R G P N V T P G Y H N K P E A T A A A F Q D G W Y R T G D L A R R D A A G Y F T I S 399  
A-GdmAl 318 - - - - - V T - - - - - 319  
A-HbmAl 320 G P R V E G S C G L P V P G L T V R L V D P D T G V D V P A G R E G E F W S G P N I M A G Y H N Q P E A T A A A L R D G W Y R T G D L G R R D E A G F C T V T 399  
A-AsmA 312 G P R V E G S S G L P V P G L A V R L V D P T G L D A P T G A E G E V W S R G P S V M V G Y H N R P E A T A A A L R D G W Y R T G D L A T R D E S G F H A V T 391  
A-RapA 317 G Q R I P G S C G L P V P G L S L R F V D P I S G A D V A D G E E G E L W A S G P S I M I G Y H E Q P E A T A E V L S D G W Y R T G D L A R R S E T G H V T I C 396

Consensus  
G+RV+GSCGLPVPVGDVRI VDPDTG+DVPAGAEGEVWVSGPNVMVGYHNSPEATAAALRDGWYRTGD LARRDEAGYFT+T

410 420 430 440 450 460 470

A-CxmA 396 G R I K E L V I R G G E N I H P Q E V E T V L R T V P G V A D A A V A G V P H D T L G E V P V A Y V I P G P S G F D V R D L L A R C R E R L A A Y K V P E Q I H 474  
A-RifA 395 G R I K E L I I R G G A N I H P G E V A V L R T V D G V A D A A V G V P H D T L G E V P V A Y V I P G T G F D P A A L I E K E C R E Q L S A Y K V P R I L 474  
A-NatA 401 G R L K D L V V R G G E N I H P D E V E A V L R T A P G V A D A G V A A A H D T L G E V P V A W L V P G D G L D I A A V L D H C R A R L S A Y K I P E R I H 480  
A-RubA 400 G R I N D L I R G G E N V H P E I E A V I R A V P G I A D V G A G R P H E V L G E V P V A V V A G P S G V E A D A I E R C R R L S T F K L P E E V Y 479  
A-GdmAl 320 G R I K E L V I R A G E N I H P G E V E A V L R T V P G V A D A A V V G K P H A V L G E V P V A F V V P G D G F D P S A L L A T C R E R L S Y F K V P E E I Y 399  
A-HbmAl 400 G R I K E L V I R A G E N I H P G E V E A V L R T V P G V A D A A V V G K P H A V L G E V P V A F V V P G D G F D P S A L L A T C R E R L S Y F K V P E E I Y 479  
A-AsmA 392 G R I D D V V R G G E K V H P A E V A V L R A V P G V A D A A V V G R P H D V L G E V P V A F L V P G - E G F D P A Q V L A V C R E R L S Y H K V P E E I Y 470  
A-RapA 397 G R I K E L I I R G G E N I H P H E I E A V A L D V P G V K D A A A A G Q H P V L G E I P V L V V P E T G G V D T D M V L A V C R E R L S Y F K V P E E I Y 476

Consensus  
GR I K E L V I R G G E N I H P G E V A V L R T V P G V A D A A V A G K P H D V L G E V P V A Y V V P G D G F D P A A + L A + C R E R L S Y F K V P E E I Y

490

A-CxmA 476 E V A A I P R T A S G K T R R R L L 493  
A-RifA 475 E V A H I P R T A S G K I R R G L - 491  
A-NatA 481 E A A G I P R T P S G K I V R R L L 498  
A-RubA 480 E V A G V P R T A S G K I O R R L L 497  
A-GdmAl 400 E I A R V P R T A S G K I T R H V L 417  
A-HbmAl 480 E I A R V P R T A S G K I T R H V L 497  
A-AsmA 471 Q I E S V P R T A S G K I T R R V L 488  
A-RapA 477 R V D A I P R T A S G K V K R S S L 494

Consensus  
EVA++PRTASGKITRRL

| Adenylation domain | Biosynthetic gene cluster | Substrate specificity | Microorganism                                                      |
|--------------------|---------------------------|-----------------------|--------------------------------------------------------------------|
| A-CxmA             | Chaxamycin                | AHBA                  | <i>Streptomyces leeuwenhoekii</i>                                  |
| A-RifA             | Rifamycin                 | AHBA                  | <i>Amycolatopsis mediterranei</i> S699                             |
| A-NatA             | Naphthomycin              | AHBA                  | <i>Streptomyces</i> sp. CS                                         |
| A-RubA             | Rubradirin                | AHBA                  | <i>Streptomyces achromogenes</i> var. <i>rubradiris</i> NRRL 3061  |
| A-GdmAl            | Geldanamycin              | AHBA                  | <i>Streptomyces geldanamycininus</i> NRRL 3602                     |
| A-HbmAl            | Herbimycin                | AHBA                  | <i>Streptomyces hygrosopicus</i> AM 3672                           |
| A-AsmA             | Ansamitocin               | AHBA                  | <i>Actinosynnema pretiosum</i> subsp. <i>auranticum</i> ATCC 31565 |
| A-RapA             | Rapamycin                 | DHCHC                 | <i>Streptomyces rapamycinicus</i> NRRL 5491                        |

AHBA = 3-amino-5-hydroxybenzoic acid; DHCHC = 4,5-dihydroxycyclohex-1-ene carboxylic acid.

**FIG S9** Comparison of the amino acid sequence of the adenylation domain present in the loading module of the chaxamycin polyketide synthase (PKS) with other adenylation domains from PKSs of known specificity. The amino acid sequences were identified by Conserved Domains Search at NCBI (8) and aligned in ClustalX (9) and visualised in Jalview (10). The AMP-binding [LIVMFY]-{E}-{VES}-[STG]-[STAG]-G-[ST]-[STEI]-[SG]-x-[PASLIVM]-[KR] motif (Prosite (11) accession number PS00455) and the conserved ATPase TGD motif (12) are shown in yellow boxes.

HxxxGxxxxP

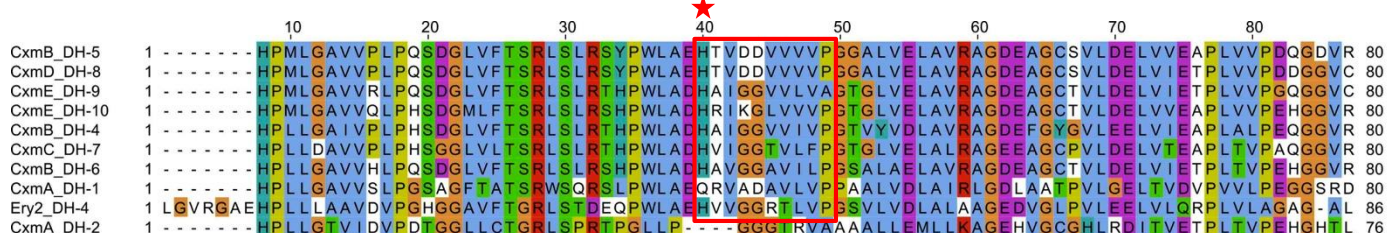

Consensus

-----HPLLGA VVPLPQSDGLVFTSRSLRSRHPWLADHAVGGVVLVPGTALVELAVRAGDEAGC+VLDLDELV+E+PLVVPEQGGVR

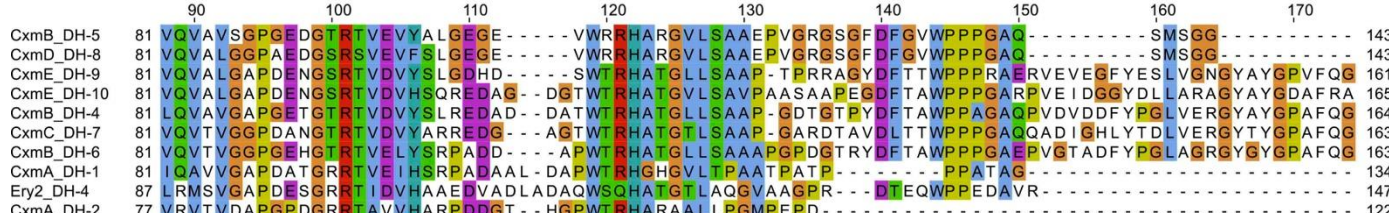

Consensus

VQVAVGAPDE+GTRTVDVYS++EDADL-DA+WTRHATGVLSAAPP+RGTYDFTAWPPPGAQPV++D+FYPVSLVGRGYAYGPAFQG

DAAL(Q/H)

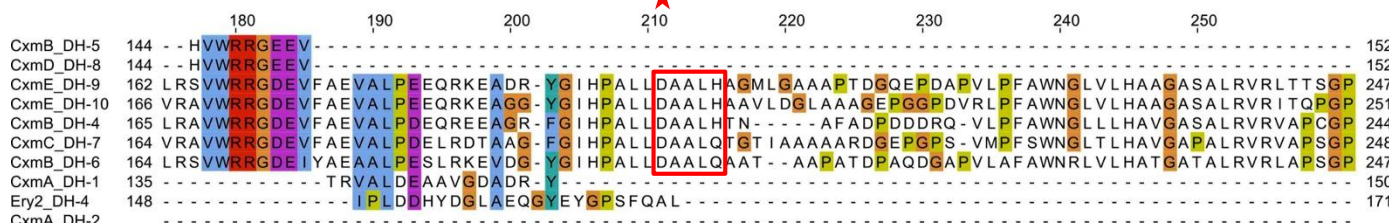

Consensus

LRAVWRRGDEVFAEVALPEEQRKEAD+-YGIHPALLDAALHA+TL-AAAA+D+-+PAPVLPFAWNGLVLHA+GASALRVR+APSGP

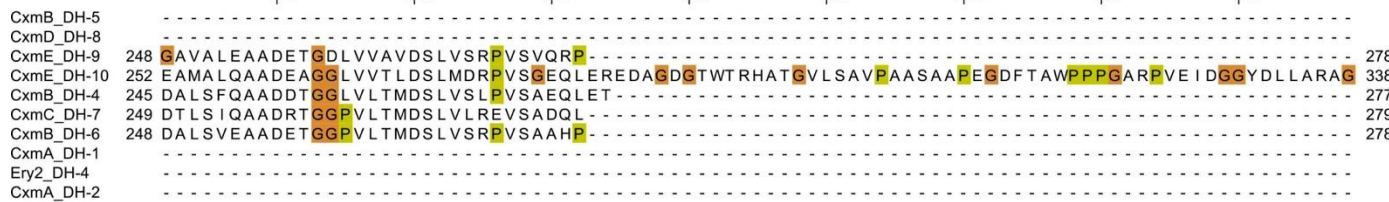

Consensus

DALSQAADETGGVLVTMDSLVSRPVSAEQL-----

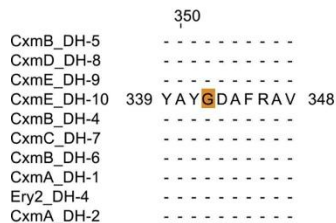

Consensus

-----

**FIG S10** Manually-curated bioinformatic analysis of DH domains present in the chaxamycin PKS to assess dehydratase activity. The amino-acid sequences of DH domains detected by Conserved Domains Search at NCBI (8) were aligned in ClustalX (9) and visualised in Jalview (10). The conserved catalytic dyad present in DH-4 from the erythromycin polyketide synthase consists of the His residue in **HXXXGXXXXP** motif and the Asp in **D(A/V)(V/A)(A/L)(Q/H)** (13). The conserved motifs are shown in red boxes and the His and Asp residues of the catalytic dyad are indicated with red stars.

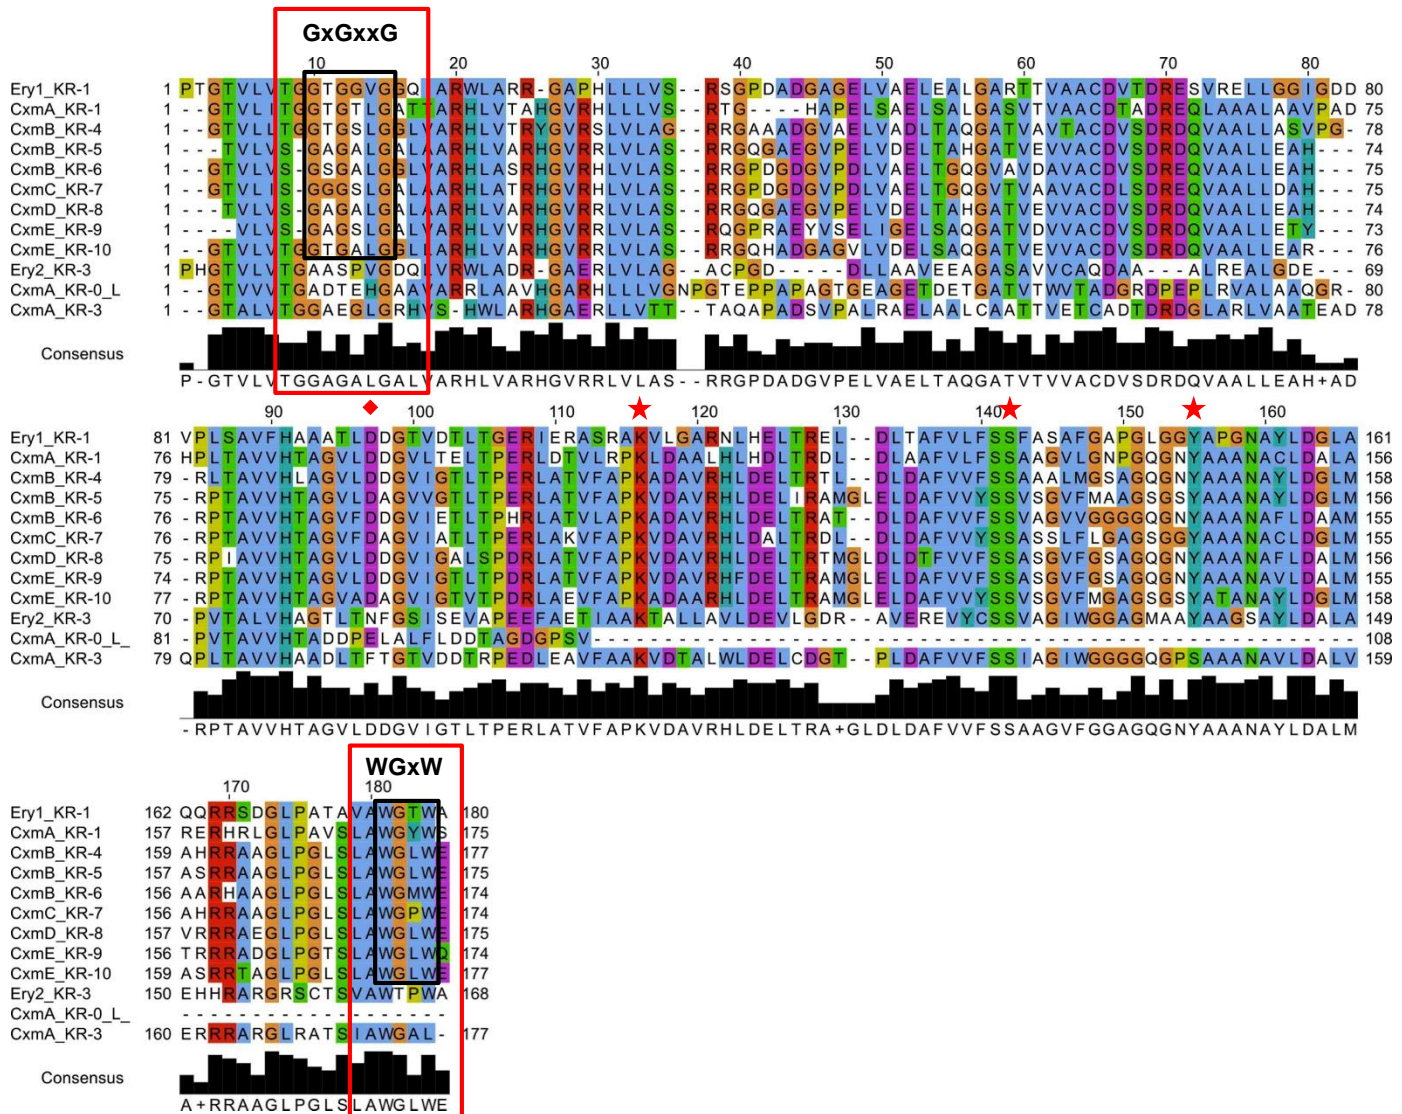

**FIG S11** Manually-curated bioinformatic analysis of KR domains present in the chaxamycin PKS to assess reductase activity. The amino-acid sequences of KR domains detected by antiSMASH (14) were aligned in ClustalX (9) and visualised in Jalview (10). The NADPH binding motifs previously characterised are shown contained in red boxes; the conserved residues in the KR domains with active reductase activity, GxGxxG and WGxW, are contained in black boxes (as shown in Figure 2 of Reference (15)). Erythromycin KR domains 1 and 3 are shown for reference, as in Figure 2 of Reference (15). A red diamond indicates the Asp residue diagnostic of PKS KR stereospecificity (present = reduction leaves the  $\beta$ -OH group in *D*-orientation; absent = reduction leaves the  $\beta$ -OH group in *L*-orientation) and the catalytic triad in the active site, Lys, Ser and Tyr, are indicated with red stars (as in Reference (16)).



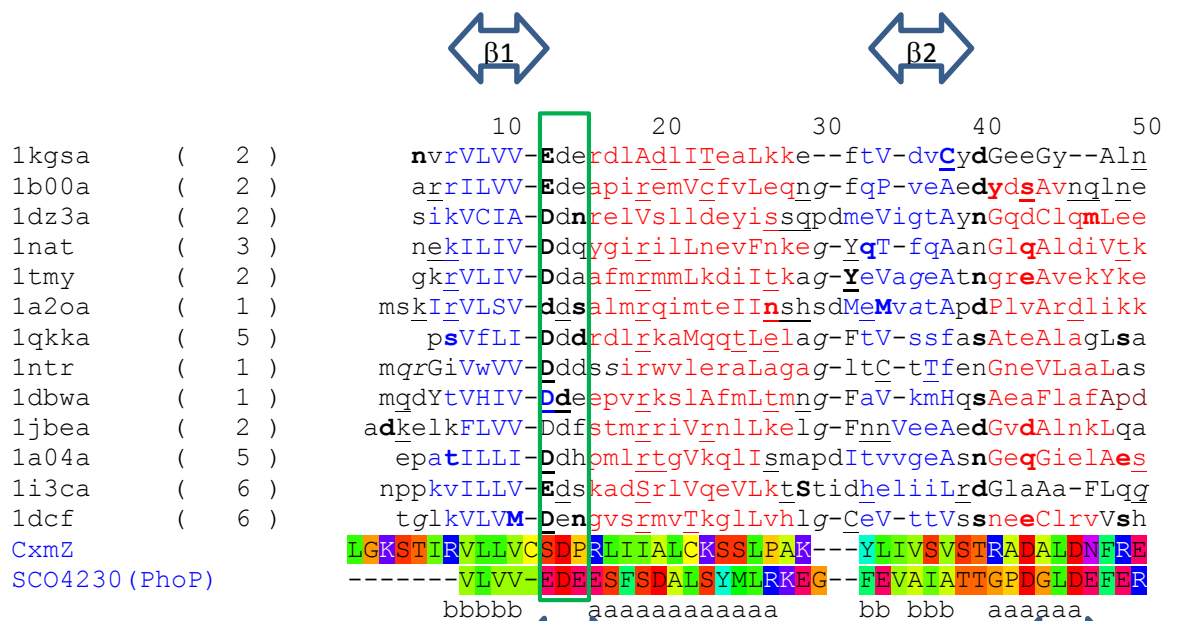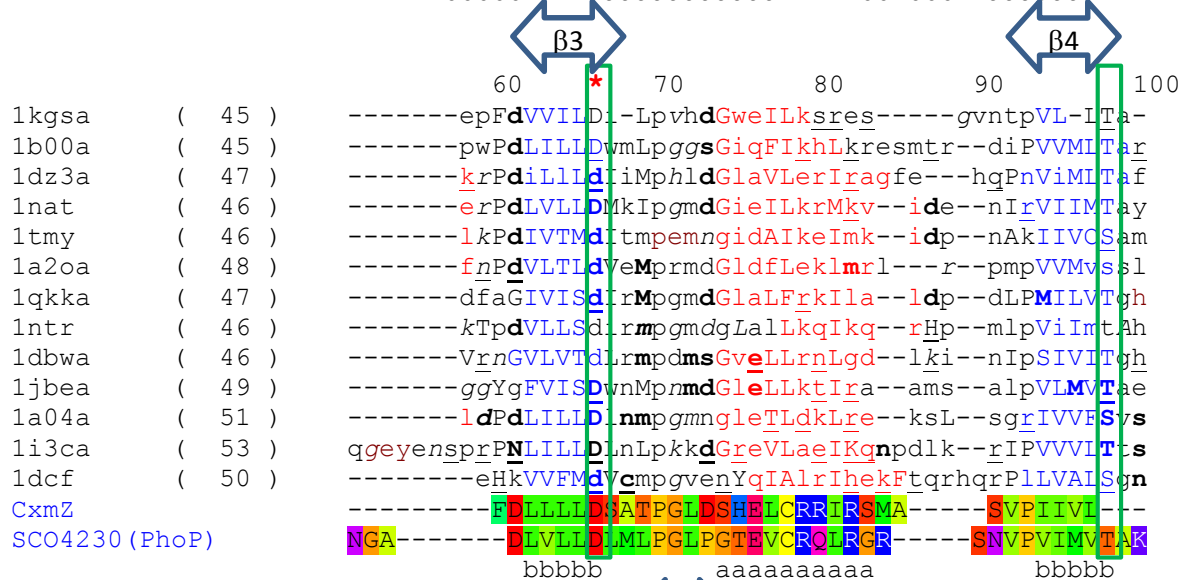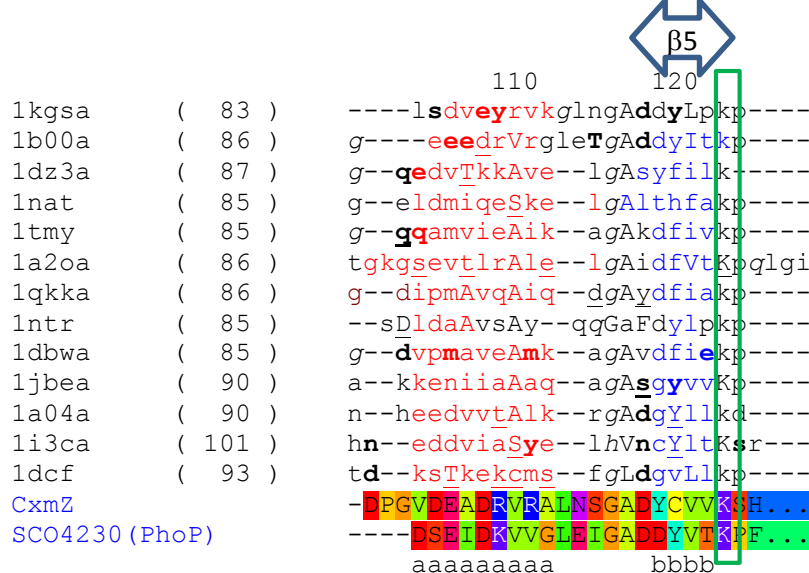

| Key                                  |                  |          |
|--------------------------------------|------------------|----------|
| alpha helix                          | red              | x        |
| beta strand                          | blue             | x        |
| 3 <sub>10</sub> helix                | maroon           | x        |
| solvent accessible                   | lower case       | x        |
| solvent inaccessible                 | UPPER CASE       | X        |
| hydrogen bond to main-chain amide    | <b>bold</b>      | <b>x</b> |
| hydrogen bond to main-chain carbonyl | <u>underline</u> | <u>x</u> |
| disulfide bond                       | cedilla          | ç        |
| positive phi torsion angle           | <i>italic</i>    | x        |

**FIG S12** Predicted secondary structure of CxmZ and evaluation of the presence of catalytically-relevant residues, supporting the classification of CxmZ as an Atypical Response Regulator. Structural alignment of CxmZ, with several response regulators whose tertiary structure has been solved, performed with FUGUE (Ver 2.0) Profile Library Search Against HOMSTRAD (<http://tardis.nibio.go.jp/fugue/align.php>; (17). The five conserved catalytic residues (18) at the carboxy-termini of the beta-sheets (Ct- $\beta$ ) are boxed in green: three acidic residues at the end of Ct- $\beta$ 1 (D,D,D/E), the aspartate that is phosphorylated at the end of Ct- $\beta$ 3 (red asterisk), the threonine or serine at the end of Ct- $\beta$ 4 and the lysine at the end of Ct- $\beta$ 5. The typical-response-regulator PhoP from *Streptomyces coelicolor* (CAB77324.1) has been aligned for reference. Note that two of the acidic residues at the end of Ct- $\beta$ 1 involved in Mg<sup>2+</sup> binding are missing in CxmZ, making phosphorylation of the Asp residue at Ct- $\beta$ 3 unlikely. The conserved catalytic site threonine/serine at Ct- $\beta$ 4 is also missing in CxmZ.

| PDB accession number | Function                                                                       | Microorganism                      |
|----------------------|--------------------------------------------------------------------------------|------------------------------------|
| 1kgs                 | DNA binding response regulator D                                               | <i>Thermotoga maritima</i>         |
| 1b00                 | Phosphate regulon transcriptional regulatory protein PhoB                      | <i>Escherichia coli</i>            |
| 1dz3                 | Stage 0 sporulation protein A                                                  | <i>Bacillus stearothermophilus</i> |
| 1nat                 | Sporulation response regulatory protein                                        | <i>Bacillus subtilis</i>           |
| 1tmy                 | CheY protein                                                                   | <i>Thermotoga maritima</i>         |
| 1a2o                 | CheB methylesterase                                                            | <i>Salmonella typhimurium</i>      |
| 1qkk                 | C4-dicarboxylate transport transcriptional regulatory protein, receiver domain | <i>Sinorhizobium meliloti</i>      |
| 1ntr                 | N-terminal receiver domain of NtrC                                             | <i>Salmonella typhimurium</i>      |
| 1dbw                 | Transcriptional regulatory protein FixJ, receiver domain                       | <i>Rhizobium meliloti</i>          |
| 1jbe                 | Chemotaxis protein CheY                                                        | <i>Escherichia coli</i>            |
| 1a04                 | Nitrate/nitrite response regulator protein NarL, N-terminal domain             | <i>Escherichia coli</i>            |
| 1i3c                 | Response regulator Rcp1                                                        | <i>Synechosystis Sp. Pcc 6803</i>  |
| 1dcf                 | Etr1 protein, receiver domain                                                  | <i>Arabidopsis thaliana</i>        |

---

```

Sle29840    412  SIKEFFGTSQLSQFMDQNNPLSGLTHKRRLNALGPGGLSRERAGFEVRDVHPSHYGRMCP 471
SCO4654    412  SIKEFFGTSQLSQFMDQNNPLSGLTHKRRLNALGPGGLSRERAGFEVRDVHPSHYGRMCP 471
Ame_rpoB   417  AIKEFFGTSQLSQFMQQTNPIDGLTHKRRLNALGPGGLSRERAGMEVRDVHPSHYGRMCP 476
          :*****:*.**.:*****:*****

```

---

**FIG S13** Alignment of RpoB sequences (with ClustalX; (9)) showing the region that contains the amino-acid residues responsible for resistance to rifamycin in the natural producer *Amycolatopsis mediterranei* S699: Q432, D438 and N447 (19) are highlighted in green. Sle29840, *Streptomyces leeuwenhoekii*; SCO4654, *Streptomyces coelicolor* A3(2) (NP\_628815.1), Ame\_rpoB, *A. mediterranei* S699 (AAS07760.1). The alignment reveals that the residues at equivalent positions 432 and 438 in *S. leeuwenhoekii* are the same as those in the RpoB of *S. coelicolor*, which is rifamycin-sensitive.

**TABLE S1** DNA sequences of phage integration sites.

| <i>attB</i> site | DNA sequence 5'→3'                                                               |
|------------------|----------------------------------------------------------------------------------|
| ΦC31-Sco         | CGGTG <u>C</u> GGGTGCCAGGG <u>C</u> GTGCC TT GGGCTC <u>C</u> CGGGCGCGTACTCCAC    |
| ΦC31-Sle         | CGGTG <u>G</u> GGGTGCCAGGG <u>G</u> GTGCC TT GGGCTC <u>I</u> CGGGCGCGTACTCCAC    |
| ΦBT1-Sco         | TCCTTGAC <u>C</u> AGGTTTTTGACGAAA GT GATCCAGATGA <u>I</u> CCAGCTCCACAC           |
| ΦBT1-Sle         | TCCTTGAT <u>I</u> CAG <u>A</u> TTTTTGACGAAA GT GATCCAGATGA <u>C</u> CCAGCTCCACAC |

Putative DNA sequences of bacterial attachment sites (*attB*) that are recognised by the ΦC31 and ΦBT1 integrases in *S. leeuwenhoekii* (Sle) were identified using BLASTn (20) with the known *attB* sequences for ΦC31 and ΦBT1 in *S. coelicolor* (Sco) (21, 22), respectively). Differences are underlined.

**TABLE S2** Genes in which phage integration sites are located

| <i>attB</i> site | Locus coordinates | Gene            | Predicted gene product function (annotation)              |
|------------------|-------------------|-----------------|-----------------------------------------------------------|
| ΦC31-Sco         | 260747..260796    | <i>sco3798</i>  | Pirin protein (chromosome condensation protein)           |
| ΦC31-Sle         | 4154940..4154989  | <i>sle35040</i> | Pirin protein (putative quercetin 2,3-dioxygenase PA2418) |
| ΦBT1-Sco         | 201997..201948    | <i>sco4848</i>  | Putative integral membrane protein                        |
| ΦBT1-Sle         | 3403179..3403228  | <i>sle28260</i> | Putative integral membrane protein                        |

The genes in which the ΦC31 and ΦBT1 attachment sites (*attB*) are located in the *S. coelicolor* (Sco) and *S. leeuwenhoekii* (Sle) chromosomes are homologs. Sle35040 and Sle28260 have 92% and 91% amino acid identity with Sco3798 (Gene ID: 1099234) and Sco4848 (Gene ID: 1100289), respectively.

**TABLE S3:** Identity between proteins encoded by the chaxamycin (*cxm*) and other ansamycin-type biosynthetic gene clusters.

| Protein  | Protein length | Highest identity <sup>1</sup>                                                                                                                                  | Rifamycin ( <i>rif</i> ) <sup>2</sup> | Saliniketol/<br>Rifamycin ( <i>sare</i> ) <sup>3</sup> | Naphthomycin ( <i>nat</i> ) <sup>4</sup> | Rubradirin ( <i>rub</i> ) <sup>5</sup> | Ansamitocin ( <i>asm</i> ) <sup>6</sup> | Geldanamycin ( <i>gdm</i> ) <sup>7</sup> |
|----------|----------------|----------------------------------------------------------------------------------------------------------------------------------------------------------------|---------------------------------------|--------------------------------------------------------|------------------------------------------|----------------------------------------|-----------------------------------------|------------------------------------------|
| Sle10440 | 693            | Alpha-galactosidase (melibiase), highly conserved but no <i>Streptomyces coelicolor</i> homolog; <i>Streptomyces cellulosae</i> (WP_030676983.1); 599/694 (86) |                                       |                                                        |                                          |                                        |                                         |                                          |
| Sle10430 | 326            | Peptidase, highly conserved, 71% identity; <b><i>Streptomyces coelicolor</i> Sco6773</b>                                                                       |                                       |                                                        |                                          |                                        |                                         |                                          |
| Sle10420 | 261            | GDSL-like lipase/acylhydrolase, very highly conserved, 92% identity; <b><i>Streptomyces coelicolor</i> Sco6774</b>                                             |                                       |                                                        |                                          |                                        |                                         |                                          |
| Sle10410 | 201            | Carboxymuconolactone decarboxylase, highly conserved but no <i>Streptomyces coelicolor</i> homolog; <i>Streptomyces</i>                                        |                                       |                                                        |                                          |                                        |                                         |                                          |

| Protein  | Protein length | Highest identity <sup>1</sup>                                                                              | Rifamycin ( <i>rif</i> ) <sup>2</sup>                                   | Saliniketal/<br>Rifamycin ( <i>sare</i> ) <sup>3</sup>              | Naphthomycin ( <i>nat</i> ) <sup>4</sup>                       | Rubradirin ( <i>rub</i> ) <sup>5</sup>                      | Ansamitocin ( <i>asm</i> ) <sup>6</sup>           | Geldanamycin ( <i>gdm</i> ) <sup>7</sup>                |
|----------|----------------|------------------------------------------------------------------------------------------------------------|-------------------------------------------------------------------------|---------------------------------------------------------------------|----------------------------------------------------------------|-------------------------------------------------------------|---------------------------------------------------|---------------------------------------------------------|
|          |                | sp. NRRL F-4835 (WP_0309717.1); 167/191 (87)                                                               |                                                                         |                                                                     |                                                                |                                                             |                                                   |                                                         |
| Sle10400 | 398            | Metallo-beta-lactamase, very highly conserved, 84% identity; <b><i>Streptomyces coelicolor</i> Sco6776</b> |                                                                         |                                                                     |                                                                |                                                             |                                                   |                                                         |
| Cxm1     | 138            | Hypothetical protein; <i>Streptomyces turgidiscabies</i> (WP_0063758.1); 55/71 (77)                        |                                                                         |                                                                     |                                                                |                                                             |                                                   |                                                         |
| CxmS     | 327            | Dehydrogenase; <i>Amycolatopsis mediterranei</i> (KDO09658.1); 260/327 (80)                                | RifS - Putative NADH-dependent dehydrogenase (AAS07752.1); 255/322 (79) | Sare1242 - Oxidoreductase domain protein (ABV97147.1); 246/325 (76) |                                                                |                                                             |                                                   | Orf6 - Oxidoreductase-like (AAY46807.1); 36/132 (27)    |
| CxmT     | 323            | Oxidoreductase; <i>Streptomyces katrae</i> (WP_0303014.1); 204/326 (63)                                    | RifT - NADH-dependent dehydrogenase (AAC01707.1); 141/265 (53)          | Sare1243 - Oxidoreductase domain protein (ABV97148.1); 190/322 (59) |                                                                |                                                             |                                                   |                                                         |
| Cxm4     | 397            | Cytochrome P450; <i>Actinomadura rifamycini</i> (WP_0264042.1); 324/397 (82)                               | Orf0 - Cytochrome P450-like protein (AAC01709.1); 320/397 (81)          | Sare1245 - Cytochrome P450 (ABV97150.1); 320/397 (81)               | Orf0 - Cytochrome P450-like protein (ADM46355.1); 269/397 (68) | RubF4 - Putative cytochrome P450 (CAI94704.1); 190/408 (47) | Asm30 - Cytochrome P450 (AAM54108.1); 63/202 (31) | GdmP - P450 (PikC subfamily) (AAO06929.1); 149/391 (38) |
| CxmA     | 5616           | AMP-dependent                                                                                              | RifA - Rifamycin polyketide                                             | Sare1246 - AMP-dependent                                            | NatA - Polyketide synthase                                     | RubA - Putative polyketide                                  | AsmD - Polyketide Synthase                        | GdmAll - Polyketide                                     |

| Protein | Protein length | Highest identity <sup>1</sup>                                                                               | Rifamycin ( <i>rif</i> ) <sup>2</sup>                                   | Saliniketol/<br>Rifamycin ( <i>sare</i> ) <sup>3</sup>                  | Naphthomycin ( <i>nat</i> ) <sup>4</sup>                      | Rubradirin ( <i>rub</i> ) <sup>5</sup>                                 | Ansamitocin ( <i>asm</i> ) <sup>6</sup>                       | Geldanamycin ( <i>gdm</i> ) <sup>7</sup>                                     |
|---------|----------------|-------------------------------------------------------------------------------------------------------------|-------------------------------------------------------------------------|-------------------------------------------------------------------------|---------------------------------------------------------------|------------------------------------------------------------------------|---------------------------------------------------------------|------------------------------------------------------------------------------|
|         |                | synthetase and ligase;<br><i>Salinispora arenicola</i><br>(WP_0121814 59.1);<br>3525/4669 (75)              | synthase<br>(AAC01710.1);<br>1936/2678 (72)                             | synthetase and ligase<br>(ABV97151.1);<br>3525/4669 (75)                | (ADM46356.1);<br>3425/5078 (67)                               | synthase<br>(CAI94682.1);<br>2207/3714 (59)                            | (AAM54078.1);<br>1488/2991 (50)                               | synthase; modules 4-5<br>(AAO06917.1);<br>1395/2703 (52)                     |
| CxmB    | 5363           | Rifamycin polyketide synthase;<br><i>Salinispora arenicola</i><br>(WP_0199021 08.1);<br>3969/5273 (75)      | RifB - Rifamycin polyketide synthase<br>(AAC01711.1);<br>3854/5166 (75) | Sare1247 - Beta-ketoacyl synthase<br>(ABV97152.1);<br>3969/5273 (75)    | NatC – Polyketide synthase<br>(ADM46358.1);<br>3560/5315 (67) | RubB - Putative polyketide synthase<br>(CAI94713.1);<br>2550/4688 (54) | AsmD - Polyketide synthase<br>(AAM54078.1);<br>1208/2218 (54) | GdmAll - Polyketide synthase; modules 4-5<br>(AAO06917.1);<br>1485/2730 (54) |
| CxmC    | 1820           | Rifamycin polyketide synthase;<br><i>Amycolatopsis mediterranei</i><br>(WP_0132225 49.1);<br>1361/1827 (74) | RifC - Rifamycin polyketide synthase<br>(AAC01712.2);<br>1365/1823 (75) | Sare1248 - Beta-ketoacyl synthase<br>(ABV97153.1);<br>1329/1844 (72)    | NatC – Polyketide synthase<br>(ADM46358.1);<br>1126/1779 (63) | RubB - Putative polyketide synthase<br>(CAI94713.1);<br>993/1787 (56)  | AsmD - Polyketide synthase<br>(AAM54078.1);<br>910/1749 (52)  | GdmAll - Polyketide synthase; modules 4-5<br>(AAO06917.1);<br>950/1823 (52)  |
| CxmD    | 1773           | Polyketide synthase;<br><i>Streptomyces albogriseolus</i><br>(AHD24377.1);<br>1313/1864 (70)                | RifD - Rifamycin polyketide synthase<br>(AAC01713.1);<br>1281/1788 (72) | Sare1249 - Beta-ketoacyl synthase<br>(ABV97154.1);<br>1252/1817 (69)    | NatC – Polyketide synthase<br>(ADM46358.1);<br>1082/1778 (61) | RubB - Putative polyketide synthase<br>(CAI94713.1);<br>967/1777 (54)  | AsmD - Polyketide Synthase<br>(AAM54078.1);<br>899/1731 (52)  | GdmAll - Polyketide synthase; modules 4-5<br>(AAO06917.1);<br>936/1808 (52)  |
| CxmE    | 3488           | Polyketide synthase;<br><i>Salinispora arenicola</i><br>(WP_0286782 12.1);<br>2468/3522 (70)                | RifE - Rifamycin polyketide synthase<br>(AAC01714.1);<br>2434/3497 (70) | Sare1250 - Acyl transferase<br>(ABV97155.1);<br>2463/3521 (70)          | NatC – polyketide synthase<br>(ADM46358.1);<br>2189/3571 (61) | RubB - Putative polyketide synthase<br>(CAI94713.1);<br>1825/3557 (51) | AsmD - Polyketide synthase<br>(AAM54078.1);<br>1154/2199 (52) | GdmAll - Polyketide synthase; modules 4-5<br>(AAO06917.1);<br>1357/2757 (49) |
| CxmF    | 269            | <i>N</i> -acetyltransferase/amide synthase;<br><i>Amycolatopsis</i>                                         | RifF - Amide synthase<br>(AAC01715.1);<br>194/256 (76)                  | Sare1251 - <i>N</i> -acetyltransferase<br>(ABV97156.1);<br>185/257 (72) | NatF - Amide synthase<br>(ADM46361.1);<br>158/289 (55)        | RubF - Putative amide synthase<br>(CAI94702.1);<br>125/267 (47)        | Asm9 - Amide synthase<br>(AAM54087.1);<br>105/258 (41)        | GdmF - amide synthase; RifF homolog<br>(AAO06919.1);<br>107/273 (39)         |



| Protein | Protein length | Highest identity <sup>1</sup>                                                                                          | Rifamycin ( <i>rif</i> ) <sup>2</sup>                             | Saliniketol/<br>Rifamycin ( <i>sare</i> ) <sup>3</sup>                                            | Naphthomycin ( <i>nat</i> ) <sup>4</sup>                                    | Rubradirin ( <i>rub</i> ) <sup>5</sup>                      | Ansamitocin ( <i>asm</i> ) <sup>6</sup>                                     | Geldanamycin ( <i>gdm</i> ) <sup>7</sup>                          |
|---------|----------------|------------------------------------------------------------------------------------------------------------------------|-------------------------------------------------------------------|---------------------------------------------------------------------------------------------------|-----------------------------------------------------------------------------|-------------------------------------------------------------|-----------------------------------------------------------------------------|-------------------------------------------------------------------|
|         |                | <i>vancoresmycin a</i><br>(WP_004559807.1); 189/257 (74)                                                               |                                                                   |                                                                                                   |                                                                             |                                                             |                                                                             |                                                                   |
| CxmG    | 368            | Aminodehydroquinone synthase;<br><i>Amycolatopsis mediterranei</i> U32<br>(YP_003762846.1); 293/347 (84)               | RifG - Aminodehydroquinone synthase<br>(AAC01717.1); 290/341 (85) | Sare1253 - 3-dehydroquinone synthase<br>(ABV97158.1); 284/341 (83)                                | NatG - 3-dehydroquinone synthase<br>(ADM46363.1); 266/336 (79)              | RubG - Putative aDHQ synthase<br>(CAI94724.1); 266/332 (80) | Orf10 - Aminodehydroquinone synthase<br>(AAC14006.1); 246/335 (73)          | Orf2 - Aminodehydroquinone synthase<br>(AAV46803.1); 243/332 (73) |
| CxmH    | 406            | Phospho-2-dehydro-3-deoxyheptonate aldolase;<br><i>Amycolatopsis vancoresmycin a</i><br>(WP_004559804.1); 311/413 (75) | RifH - AminoDAHP synthase<br>(AAC01718.1); 290/427 (68)           | Sare1254 - 3-deoxy-7-phosphoheptonate synthase<br>(ABV97159.1); 291/391 (74)                      | NatH - DAHP synthase<br>(ADM46364.1); 272/441 (62)                          | RubH - Putative DAHP synthase<br>(CAI94725.1); 295/397 (74) |                                                                             |                                                                   |
| Cxml    | 268            | Shikimate dehydrogenase;<br><i>Actinomadura rifamycini</i><br>(WP_02640409.1); 213/266 (80)                            | RifI - Aminoquinone dehydrogenase<br>(AAC01719.1); 202/261 (77)   | Sare1274 - Shikimate dehydrogenase substrate binding domain protein<br>(ABV97179.1); 144/265 (54) | NatI - Shikimate/quinone dehydrogenase<br>(ADM46365.1); 186/268 (69)        | RubI - Putative oxidoreductase<br>(CAI94690.1); 18/44 (41)  |                                                                             |                                                                   |
| CxmK    | 386            | 3-amino-5-hydroxybenzoic acid synthase;<br><i>Amycolatopsis mediterranei</i>                                           | RifK - AHBA synthase<br>(AAC01720.1); 330/388 (85)                | Sare1255 - Glutamine--scyllo-inositol transaminase<br>(ABV97160.1); 321/388 (83)                  | NatK - 3-amino-5-hydroxybenzoic acid synthase<br>(ADM46366.1); 313/384 (82) | RubK - Putative AHBA synthase<br>(CAI94689.1); 293/384 (76) | Orf6 - 3-amino-5-hydroxybenzoic acid synthase<br>(AAC13997.1); 270/365 (74) | Orf5 - AHBA synthase<br>(AAV46806.1); 281/385 (73)                |

| Protein | Protein length | Highest identity <sup>1</sup>                                                                                                                             | Rifamycin ( <i>rif</i> ) <sup>2</sup>                                                   | Saliniketol/<br>Rifamycin ( <i>sare</i> ) <sup>3</sup>                                     | Naphthomycin ( <i>nat</i> ) <sup>4</sup>                                    | Rubradirin ( <i>rub</i> ) <sup>5</sup>                                           | Ansamitocin ( <i>asm</i> ) <sup>6</sup>                   | Geldanamycin ( <i>gdm</i> ) <sup>7</sup>                                                |
|---------|----------------|-----------------------------------------------------------------------------------------------------------------------------------------------------------|-----------------------------------------------------------------------------------------|--------------------------------------------------------------------------------------------|-----------------------------------------------------------------------------|----------------------------------------------------------------------------------|-----------------------------------------------------------|-----------------------------------------------------------------------------------------|
|         |                | (AAA75105.1);<br>329/388 (85)                                                                                                                             |                                                                                         |                                                                                            |                                                                             |                                                                                  |                                                           |                                                                                         |
| CxmL    | 358            | Oxidoreductase;<br><i>Streptomyces</i><br>sp. 192<br>(ADI56541.1);<br>269/356 (76)                                                                        | RifL - Putative<br>oxidoreductase<br>(AAS07754.1);<br>268/357 (75)                      | Sare1256 -<br>Oxidoreductase<br>domain protein<br>(ABV97161.1);<br>265/357 (74)            | NatL –<br>Oxidoreductase<br>(ADM46367.1);<br>232/359 (65)                   | RubL - Putative<br>oxidoreductase<br>(CAI94690.1);<br>199/345 (58)               | Orf7 –<br>Oxidoreductase<br>(AAC14003.1);<br>203/365 (56) | Orf6 -<br>Oxidoreductase-<br>like (AAY46807.1);<br>207/362 (57)                         |
| CxmM    | 232            | Phosphoglycolate<br>phosphatase;<br><i>Amycolatopsis</i><br><i>rifamycinica</i><br>(KDN20697.1);<br>191/232 (82)                                          | RifM - Putative<br>phosphatase<br>(AAC01721.1);<br>193/232 (83)                         | Sare1257 - AHBA<br>synthesis<br>associated protein<br>(ABV97162.1);<br>185/232 (80)        | NatM –<br>Phosphatase<br>(ADM46368.1);<br>187/231 (81)                      | RubM - Putative<br>phosphatase<br>(CAI94691.1);<br>146/215 (68)                  | Orf8 –<br>Phosphatase<br>(AAC14004.1);<br>140/204 (69)    | Ahba1b -<br>Phosphatase-like<br>(AAY46808.1);<br>151/213 (71)                           |
| CxmN    | 307            | Kanamycin<br>kinase;<br><i>Streptomyces</i><br><i>katrae</i><br>(WP_0302938<br>22.1); 225/295<br>(76)                                                     | RifN -<br>Kanosamine<br>kinase<br>(AAC01722.2);<br>164/230 (71)                         | Sare1275 - ROK<br>family protein<br>(RifN AHBA<br>kinase)<br>(ABV97180.1);<br>157/290 (54) | NatN - Glucose<br>kinase<br>(ADM46369.1);<br>194/292 (66)                   | RubN - Putative<br>kinase<br>(CAI94692.1);<br>159/298 (53)                       | Asm22 – Kinase<br>(AAM54100.1);<br>122/226 (54)           | Orf3 - Kinase-like<br>(AAY46804.1);<br>150/253 (59)                                     |
| Cxm18   | 295            | N5,N10-<br>methylene<br>tetrahydrometh<br>anopterin<br>reductase;<br><i>Amycolatopsis</i><br><i>mediterranei</i><br>(WP_0132225<br>73.1); 204/295<br>(69) | Orf11 - Putative<br>flavin-dependent<br>oxidoreductase<br>(AAC01735.3);<br>204/295 (69) |                                                                                            |                                                                             | Orf1 –<br>Hypothetical<br>protein<br>(CAI94678.1);<br>88/269 (33)                |                                                           |                                                                                         |
| Cxm19   | 533            | 3-(3-<br>hydroxyphenyl)<br>propionate<br>hydroxylase;<br><i>Streptomyces</i>                                                                              | Orf19 - Putative 3-<br>(3-hydroxylphenyl)<br>propionate<br>hydroxylase<br>(AAG52989.1); | Sare1268 -<br>Monooxygenase<br>FAD-binding<br>(ABV97173.1);<br>405/518 (78)                | Nat2 - FAD-<br>dependent<br>oxidoreductase<br>(ADM46370.1);<br>367/540 (68) | RubP1 - Putative<br>hydroxyphenylpro<br>pionate<br>(CAI94716.1);<br>305/522 (58) | Asm11 –<br>Oxygenase<br>(AAM54089.1);<br>86/273 (32)      | GdmM - Similar to<br>Rif19; putative<br>FAD-dependent<br>monooxygenase<br>(AAO06920.1); |

| Protein | Protein length | Highest identity <sup>1</sup>                                                                             | Rifamycin ( <i>rif</i> ) <sup>2</sup>                                                 | Saliniketal/<br>Rifamycin ( <i>sare</i> ) <sup>3</sup>                                                            | Naphthomycin ( <i>nat</i> ) <sup>4</sup>                                | Rubradirin ( <i>rub</i> ) <sup>5</sup>                               | Ansamitocin ( <i>asm</i> ) <sup>6</sup>                       | Geldanamycin ( <i>gdm</i> ) <sup>7</sup>                         |
|---------|----------------|-----------------------------------------------------------------------------------------------------------|---------------------------------------------------------------------------------------|-------------------------------------------------------------------------------------------------------------------|-------------------------------------------------------------------------|----------------------------------------------------------------------|---------------------------------------------------------------|------------------------------------------------------------------|
|         |                | <i>katrae</i><br>(WP_0302938<br>23.1); 429/526<br>(82)                                                    | 388/519 (75)                                                                          |                                                                                                                   |                                                                         |                                                                      |                                                               | 279/531 (53)                                                     |
| Cxm20   | 402            | Acyltransferase<br>; <i>Salinispora arenicola</i><br>(WP_0295377<br>05.1); 253/407<br>(62)                | Orf20 - Putative<br>polyketide<br>associated protein<br>(AAG52990.1);<br>252/404 (62) | Sare1262 -<br>Conserved<br>polyketide<br>synthase<br>associated protein<br>PapA5<br>(ABV97167.1);<br>249/407 (61) |                                                                         |                                                                      |                                                               |                                                                  |
| Cxm21   | 63             | Ferredoxin;<br><i>Streptomyces chartreusis</i><br>(WP_0100405<br>69.1); 43/63<br>(68)                     |                                                                                       | Sare1261 –<br>Protein of<br>unknown function<br>DUF1271<br>(SCO7676<br>ferredoxin)<br>(ABV97166.1);<br>22/64 (34) |                                                                         |                                                                      |                                                               |                                                                  |
| Cxm22   | 393            | Cytochrome<br>P450;<br><i>Streptomyces</i><br>sp. NRRL S-<br>118<br>(WP_0310681<br>03.1); 258/399<br>(65) | Orf4 - Putative<br>cytochrome P450<br>oxidoreductase<br>(AAC01728.1);<br>221/403 (55) | Sare1260 -<br>Cytochrome<br>P450<br>(ABV97165.1);<br>154/394 (39)                                                 | Orf0 - Cytochrome<br>P450-like protein<br>(ADM46355.1);<br>143/404 (35) | RubF4 - Putative<br>cytochrome P450<br>(CAI94704.1);<br>121/410 (30) | Asm30 -<br>Cytochrome<br>P450<br>(AAM54085.1);<br>45/186 (24) | GdmP - P450<br>(PikC subfamily)<br>(AAO06929.1);<br>177/409 (43) |
| Cxm23   | 418            | Cytochrome<br>P450;<br><i>Salinispora arenicola</i><br>(WP_0290216<br>01.1); 322/412<br>(78)              | Orf13 - Putative<br>cytochrome P450<br>monooxygenase<br>(AAC01737.2);<br>306/423 (72) | Sare1259 -<br>Cytochrome P450<br>(ABV97164.1);<br>322/412 (78)                                                    | Orf0 - Cytochrome<br>P450-like protein<br>(ADM46355.1);<br>135/405 (33) | RubP6 -<br>Cytochrome P450<br>(CAI94681.1);<br>144/372 (39)          | Asm30 -<br>Cytochrome<br>P450<br>(AAM54085.1);<br>93/327 (28) | GdmP - P450<br>(PikC subfamily)<br>(AAO06929.1);<br>135/404 (33) |
| Cxm24   | 355            | Methyltransferase;<br><i>Streptomyces</i><br>sp. CNH189                                                   | Orf14 - C-27 O-<br>methyltransferase<br>(AAC01738.1);<br>22/87 (25)                   |                                                                                                                   |                                                                         |                                                                      | Asm7 –<br>Methyltransferase<br>(AAM54085.1);<br>53/224 (24)   |                                                                  |

| Protein | Protein length | Highest identity <sup>1</sup>                                                                                                | Rifamycin ( <i>rif</i> ) <sup>2</sup>                                  | Saliniketol/<br>Rifamycin ( <i>sare</i> ) <sup>3</sup>                          | Naphthomycin ( <i>nat</i> ) <sup>4</sup>                               | Rubradirin ( <i>rub</i> ) <sup>5</sup>                                  | Ansamitocin ( <i>asm</i> ) <sup>6</sup>                                             | Geldanamycin ( <i>gdm</i> ) <sup>7</sup>             |
|---------|----------------|------------------------------------------------------------------------------------------------------------------------------|------------------------------------------------------------------------|---------------------------------------------------------------------------------|------------------------------------------------------------------------|-------------------------------------------------------------------------|-------------------------------------------------------------------------------------|------------------------------------------------------|
|         |                | (AGH68906.1);<br>230/356 (65)                                                                                                |                                                                        |                                                                                 |                                                                        |                                                                         |                                                                                     |                                                      |
| CxmY    | 433            | Transcriptional regulator;<br><i>Streptomyces albogriseolus</i> (AHD24357.1);<br>289/430 (67)                                | Orf36 - Putative regulatory protein (AAS07758.1);<br>182/416 (44)      | Sare1270 - Transcriptional regulator, LuxR family (ABV97175.1);<br>177/416 (43) | Orf5 - Transcriptional regulator (ADM46353.1);<br>184/384 (48)         | RubRg2 - Putative transcription regulator (CAI94711.1);<br>113/332 (34) |                                                                                     |                                                      |
| CxmZ    | 246            | Hypothetical protein - Response regulators<br>OmpR;<br><i>Streptomyces</i> sp. NRRL B-1347 (WP_030679122.1);<br>177/242 (73) |                                                                        |                                                                                 |                                                                        |                                                                         |                                                                                     |                                                      |
| CxmJ    | 168            | 3-dehydroquinatase;<br><i>Streptomyces katrae</i> (WP_030293833.1);<br>130/147 (88)                                          | RifJ - Aminodehydroquinatase dehydratase (AAS07762.1);<br>133/153 (86) | Sare1277 - 3-dehydroquinatase dehydratase (ABV97182.1);<br>113/140 (81)         | NatJ - Aminodehydroquinatase dehydratase (ADM46373.1);<br>104/130 (80) | RubJ - Putative aDHQ dehydratase (CAI94721.1);<br>108/147 (73)          | Asm23 - 5-deoxy-5-amino-3-dehydroquinatase dehydratase (AAM54101.1);<br>94/127 (74) | Orf4 - aDHQ dehydratase (AAY46805.1);<br>98/144 (68) |

In order to assess the similarity of the chaxamycin biosynthetic gene cluster (*cxm*) to those for other ansamycin-type natural products, and to infer possible chaxamycin biosynthetic reactions by comparison with known biosynthetic pathways, we used BLASTp (20) to search for similar proteins to those encoded by the *cxm* cluster, either searching the NCBI non-redundant database or with searches targeted at specific ansamycin-type biosynthetic gene clusters. The information given in each cell of the table is, in this order: annotated function; species (accession number); identical residues/total alignment (%identity).

<sup>1</sup>Protein found in the non-redundant database from NCBI (accessed on 13 August 2014) with highest identity; <sup>2</sup>rifamycin biosynthetic gene cluster (*rif*) from *Amycolatopsis mediterranei* S699 (AF040570.3); <sup>3</sup>saliniketal/rifamycin biosynthetic gene cluster (*sare*) from *Salinispora arenicola* strain CNS-205 (CP000850); <sup>4</sup>naphthomycin biosynthetic gene cluster (*nat*) from *Streptomyces* sp. CS (GQ452266.1); <sup>5</sup>rubradirin biosynthetic gene cluster (*rub*) from *Streptomyces achromogenes* subsp. *rubradiris* (AJ871581.1); <sup>6</sup>ansamitocin biosynthetic gene cluster (*asm*) from *Actinosynnema pretiosum* subsp. *auranticum* (AF453501.1 and U33059.1); <sup>7</sup>geldanamycin biosynthetic gene cluster (*gdm*) from *Streptomyces geldanamycininus* (AY952143 and AY179507).

## References

1. **Kieser T, Bibb MJ, Buttner MJ, Chater KF, Hopwood DA.** 2000. Practical *Streptomyces* Genetics. John Innes Foundation, Norwich, UK.
2. **Rateb ME, Houssem WE, Arnold M, Abdelrahman MH, Deng H, Harrison WTA, Okoro CK, Asenjo JA, Andrews BA, Ferguson G, Bull AT, Goodfellow M, Ebel R, Jaspars M.** 2011. Chaxamycins A–D, bioactive ansamycins from a hyper-arid desert *Streptomyces* sp. *J Nat Prod* **74**:1491–1499.
3. **Floss HG, Yu T-W, Arakawa K.** 2011. The biosynthesis of 3-amino-5-hydroxybenzoic acid (AHBA), the precursor of mC<sub>7</sub>N units in ansamycin and mitomycin antibiotics: a review. *J Antibiot* **64**:35–44.
4. **Yuan H, Zhao W, Zhong Y, Wang J, Qin Z, Ding X, Zhao G-P.** 2011. Two genes, *rif15* and *rif16*, of the rifamycin biosynthetic gene cluster in *Amycolatopsis mediterranei* likely encode a transketolase and a P450 monooxygenase, respectively, both essential for the conversion of rifamycin SV into B. *Acta Biochim Biophys Sin (Shanghai)* **43**:948–956.
5. **Wilson MC, Gulder TAM, Mahmud T, Moore BS.** 2010. Shared biosynthesis of the saliniketals and rifamycins in *Salinispora arenicola* is controlled by the *sare1259*-encoded cytochrome P450. *J Am Chem Soc* **132**:12757–12765.
6. **Guo J, Frost JW.** 2004. Synthesis of aminoshikimic acid. *Org Lett* **6**:1585–1588.
7. **Yu TW, Müller R, Muller M, Zhang X, Draeger G, Kim CG, Leistner E, Floss HG.** 2001. Mutational analysis and reconstituted expression of the biosynthetic genes involved in the formation of 3-amino-5-hydroxybenzoic acid, the starter unit of rifamycin biosynthesis in *Amycolatopsis mediterranei* S699. *J Biol Chem* **276**:12546–12555.
8. **Marchler-Bauer A, Derbyshire MK, Gonzales NR, Lu S, Chitsaz F, Geer LY, Geer RC, He J, Gwadz M, Hurwitz DI, Lanczycki CJ, Lu F, Marchler GH, Song JS, Thanki N, Wang Z, Yamashita RA, Zhang D, Zheng C, Bryant SH.** 2015. CDD: NCBI's conserved domain database. *Nucleic Acids Res* **43**:D222–D226.
9. **Thompson JD, Gibson TJ, Plewniak F, Jeanmougin F, Higgins DG.** 1997. The CLUSTAL\_X windows interface: flexible strategies for multiple sequence alignment aided by quality analysis tools. *Nucleic Acids Res* **25**:4876–4882.
10. **Waterhouse AM, Procter JB, Martin DMA, Clamp M, Barton GJ.** 2009. Jalview Version 2 — a multiple sequence alignment editor and analysis workbench. *Bioinformatics* **25**:1189–1191.
11. **Sigrist CJA, de Castro E, Cerutti L, Cuče BA, Hulo N, Bridge A, Bougueleret L, Xenarios I.** 2012. New and continuing developments at PROSITE. *Nucleic Acids Res* **41**:D344–D347.
12. **Huang G, Zhang L, Birch RG.** 2001. A multifunctional polyketide–peptide synthetase essential for albicidin biosynthesis in *Xanthomonas albilineans*. *Microbiology* **147**:631–642.
13. **Valenzano CR, You Y-O, Garg A, Keatinge-Clay A, Khosla C, Cane DE.** 2010. Stereospecificity of the dehydratase domain of the erythromycin polyketide synthase. *J Am Chem Soc* **132**:14697–14699.
14. **Blin K, Medema MH, Kazempour D, Fischbach MA, Breitling R, Takano E, Weber T.** 2013. antiSMASH 2.0 — a versatile platform for genome mining of secondary metabolite producers. *Nucleic Acids Res* **41**:W204–W212.
15. **Zheng J, Keatinge-Clay AT.** 2011. Structural and functional analysis of C2-type ketoreductases from modular polyketide synthases. *J Mol Biol* **410**:105–117.
16. **Reid R, Piagentini M, Rodriguez E, Ashley G, Viswanathan N, Carney J, Santi DV, Hutchinson CR, McDaniel R.** 2003. A model of structure and catalysis for ketoreductase domains in modular polyketide synthases. *Biochemistry* **42**:72–79.
17. **Shi J, Blundell TL, Mizuguchi K.** 2001. FUGUE: sequence-structure homology recognition using environment-specific substitution tables and structure-dependent gap penalties. *J Mol Biol* **310**:243–257.
18. **Bourret RB.** 2010. Receiver domain structure and function in response regulator proteins. *Curr Opin Microbiol* **13**:142–149.
19. **Floss HG, Yu T-W.** 2005. Rifamycin — mode of action, resistance, and biosynthesis. *Chem Rev* **105**:621–632.
20. **Altschul SF, Madden TL, Schäffer AA, Zhang J, Zhang Z, Miller W, Lipman DJ.** 1997. Gapped BLAST and PSI-

BLAST: a new generation of protein database search programs. *Nucleic Acids Res* **25**:3389–3402.

21. **Rausch H, Lehmann M.** 1991. Structural analysis of the actinophage phi C31 attachment site. *Nucleic Acids Res* **19**:5187–5189.
22. **Gregory MA, Till R, Smith MCM.** 2003. Integration site for *Streptomyces* phage phiBT1 and development of site-specific integrating vectors. *J Bacteriol* **185**:5320–5323.
